# Supplementary material for: Cross-regulation by CrcZ RNA controls anoxic biofilm formation in Pseudomonas aeruginosa
Source: PubMed Central journal article supplement (PMC5175159; doi:10.1038/srep39621), 2016-12-21
Supplement: srep39621-s1.pdf [file srep39621-s1.pdf]

1 **Supplementary information**

2 **Cross-regulation by CrcZ RNA controls anoxic biofilm**  
3 **formation in *Pseudomonas aeruginosa***

4

5 Petra Pusic<sup>1</sup>, Muralidhar Tata<sup>1</sup>, Michael T. Wolfinger<sup>2,3</sup>, Elisabeth Sonnleitner<sup>1</sup>, Susanne  
6 Häussler<sup>4</sup> and Udo Bläsi<sup>1\*</sup>

7

8 <sup>1</sup>Department of Microbiology, Immunobiology and Genetics, Center of Molecular Biology,  
9 Max F. Perutz Laboratories, University of Vienna, Vienna Biocenter, Dr. Bohr-Gasse 9, 1030  
10 Vienna, Austria, <sup>2</sup>Institute of Theoretical Chemistry, University of Vienna, Währingerstrasse  
11 17, 1090 Vienna, Austria, and <sup>3</sup>Center for Anatomy and Cell Biology, Medical University of  
12 Vienna, Währingerstrasse 13, 1090 Vienna, Austria, <sup>4</sup>Helmholtz Center for Infection  
13 Research, Molecular Bacteriology, Inhoffenstraße, 38124 Braunschweig, Germany

14

15

16

17

18

19

20 \*Corresponding author.

21

## 22 **Supplementary text**

### 23 **Construction of the PA14 $\Delta$ *crcZ* mutant**

24 An in-frame deletion of the *crcZ* gene was constructed by homologous recombination<sup>54</sup>.  
25 Briefly, the 730-bp upstream- and 717-bp downstream region of the *crcZ* gene was PCR-  
26 amplified using the primer pairs W100/Y100 and X100/Z100, respectively (Supplementary  
27 Table S4). The PCR products were linked by an overlapping PCR to generate a fragment  
28 containing the in-frame *crcZ* deletion. The fragment was cloned into the *KpnI* and *XbaI* sites  
29 of plasmid pME3087 (Supplementary Table S3). Upon verification of the modification by  
30 DNA sequencing, the resulting plasmid was mobilized into PA14 with the aid of the *E. coli*  
31 strain HB101(pRK2013) and then chromosomally integrated through selection for  
32 tetracycline resistance. Excision of the vector by a second crossover event was achieved by  
33 enrichment for tetracycline-sensitive cells. The *crcZ* deletion was confirmed by standard  
34 molecular methods.

### 35 **Construction of the PA14 $\Delta$ *hfq* $\Delta$ *crcZ* mutant**

36 A deletion of the *hfq* gene was introduced in PA14 $\Delta$ *crcZ* mutant as described above. Briefly,  
37 the 717-bp upstream- and 799-bp downstream region of the *hfq* gene was PCR-amplified  
38 using the primer pairs H71/J71 and K71/I71, respectively (Supplementary Table S4). The  
39 PCR products were linked by an overlapping PCR to generate a fragment containing a 246-bp  
40 deletion, which spans the entire *hfq* coding region except for the stop codon. The fragment  
41 was cloned into the *BamHI* and *EcoRI* sites of plasmid pME3087 (Supplementary Table S3).  
42 Upon verification of the modification by DNA sequencing, the resulting plasmid was  
43 mobilized into PA14 $\Delta$ *crcZ* with the aid of the *E. coli* strain HB101(pRK2013) and then  
44 chromosomally integrated through homologous recombination as described above. The *hfq*  
45 deletion was confirmed by standard molecular methods.

## 46 **RT-PCR**

47 RNA was extracted from B-96 cells after co-immunoprecipitation with Hfq-specific  
48 antibodies from the co-immunoprecipitate (CoIP, Hfq-bound fraction) and from the  
49 remaining supernatant (SN, Hfq-unbound fraction). For cDNA synthesis, 500 ng RNA  
50 template was mixed with 250 ng of random primers (Promega). The mixture was then treated  
51 at 65°C for 5 min, followed by 5 min incubation on ice. The cDNA synthesis was performed  
52 with AMV reverse transcriptase (Promega) according to the manufacturer's instructions. 2 µl  
53 of cDNA derived from the RNA co-immunoprecipitated with Hfq and from the unbound total  
54 RNA, respectively, were used as a template for PCR amplification using the oligonucleotides  
55 C3 and E2 (Supplementary Table S4; CrcZ), T131 and U131 (Supplementary Table S4;  
56 ErsA) or D112 and E112 (Supplementary Table S4; RsmZ), respectively. The corresponding  
57 PCR products were 151 bp (CrcZ), 119 bp (ErsA) and 96 bp (RsmZ) in length. To confirm  
58 total DNA depletion of the RNA samples, the PCR reactions were performed with the same  
59 amount of RNA as used for the RT-PCR reaction without reverse transcriptase.

## 60 **Western-blot analyses**

61 Equal amounts of protein fractions were separated on 12.5% SDS-polyacrylamide gels and  
62 then electro-blotted to a nitrocellulose membrane. The blots were blocked with 5% dry milk  
63 in TBS buffer, followed by probing with rabbit anti-Hfq (Pineda). The antibody-antigen  
64 complexes were visualized with horseradish peroxidase conjugated secondary antibodies  
65 (Cell Signaling Technology) using the enhanced chemiluminescent (ECL) HRP substrate  
66 (SuperSignal West Pico Chemiluminescent Substrate, Thermo Scientific) and ChemiDoc  
67 Touch Imaging System (BioRad).

68

69 **Metabolic activity assay using the *rrnBP1*-GFP<sub>AGA</sub> bioreporter**

70 The delivery plasmid for miniTn7(Gm)-P<sub>*rrnBP1*</sub>-*gfp*-AGA-a<sup>24</sup> and the helper plasmid pUX-  
71 BF13 (encodes the transposase genes) were introduced together by electroporation in strains  
72 PA14, PA14Δ*hfq* and PA14Δ*crcZ*, respectively, as previously described<sup>55</sup>. To monitor the  
73 metabolic state of the cells in anoxic biofilms, Gfp (excitation, 488 nm; emission, 517 nm)  
74 synthesis was measured in 24h-intervals for 4 days.

75 **Biofilm assays**

76 For the static crystal violet assay<sup>34</sup> the cultures were inoculated as described in the Methods  
77 section and incubated for 96h. Then, the contents of tubes were removed, washed 3 times  
78 with water and air dried. 1.2 ml of 0.1% (w/v) crystal violet was added followed by  
79 incubation at room temperature for 10 min. The tubes were washed and air dried. The stain  
80 attached to the tubes was solubilized using 95% ethanol. Biofilm formation was assessed by  
81 measuring the optical density of each sample at a wavelength of 595 nm.

82

## 83 Supplementary References

- 84 54. Ye, R. W. *et al.* Anaerobic activation of the entire denitrification pathway in  
85 *Pseudomonas aeruginosa* requires Anr, an analog of Fnr. *J. Bacteriol.* **177**, 3606–3609  
86 (1995).
- 87 55. Koch, B., Jensen, L. E. & Nybroe, O. A panel of Tn7-based vectors for insertion of the  
88 *gfp* marker gene or for delivery of cloned DNA into Gram-negative bacteria at a  
89 neutral chromosomal site. *J. Microbiol. Methods* **45**, 187–195 (2001).
- 90 56. Gamper, M., Zimmermann, A. & Haas, D. Anaerobic regulation of transcription  
91 initiation in the *arcDABC* operon of *Pseudomonas aeruginosa*. *J. Bacteriol.* **173**,  
92 4742–4750 (1991).
- 93 57. Liberati, N. T. *et al.* An ordered, nonredundant library of *Pseudomonas aeruginosa*  
94 strain PA14 transposon insertion mutants. *Proc. Natl. Acad. Sci. United States Am.*  
95 **103**, 2833–2838 (2006).
- 96 58. Wurtzel, O. *et al.* The single-nucleotide resolution transcriptome of *Pseudomonas*  
97 *aeruginosa* grown in body temperature. *PLoS Pathog.* **8**, e1002945 (2012).
- 98 59. Boyer, H. W. & Roulland-Dussoix, D. A complementation analysis of the restriction  
99 and modification of DNA in *Escherichia coli*. *J. Mol. Biol.* **41**, 459–472 (1969).
- 100 60. Voisard, C. *et al.* in *Molecular Ecology of Rhizosphere Microorganisms* 67–89  
101 (Wiley-VCH Verlag GmbH, 1994). doi:10.1002/9783527615810.ch6
- 102 61. Figurski, D. H. & Helinski, D. R. Replication of an origin-containing derivative of  
103 plasmid RK2 dependent on a plasmid function provided in *trans*. *Proc. Natl. Acad. Sci.*  
104 *U. S. A.* **76**, 1648–1652 (1979).
- 105 62. Bao, Y., Lies, D. P., Fu, H. & Roberts, G. P. An improved Tn7-based system for the

106 single-copy insertion of cloned genes into chromosomes of Gram-negative bacteria.  
107 *Gene* **109**, 167–168 (1991).

108

109

110 **Supplementary Figures**

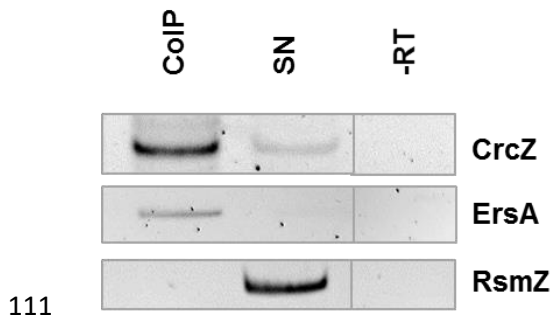

112 **Supplementary Figure S1. Hfq co-immunoprecipitates with CrcZ and ErsA in B-96**  
113 **cultures.**

114 RNA was extracted from lysates of B-96 cultures after co-immunoprecipitation with Hfq-  
115 specific antibodies (CoIP; Hfq-bound fraction) and from the remaining supernatant (SN, Hfq-  
116 unbound fraction). Equal amounts were used for RT-PCR with specific primers for CrcZ,  
117 ErsA and RsmZ as described in Supplementary text. -RT, mock experiment with RNA  
118 obtained from the Hfq-bound fraction (CoIP) in the absence of reverse transcriptase.

119

a

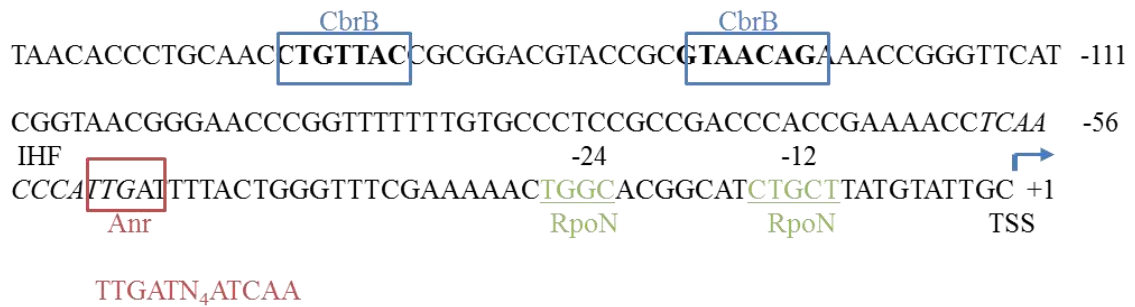

b

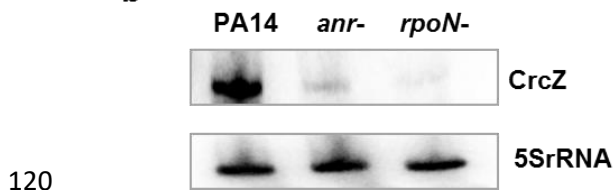

121 **Supplementary Figure S2. Anr stimulates *crcZ* expression in B-96 cultures.**

122 a Sequence of the *crcZ* promoter region. The transcriptional start site (TSS, +1) is marked  
123 with an arrow. The RpoN promoter sequence is shown in green and underlined. A putative  
124 IHF binding site is shown in italics. The CbrB binding sites and a partial putative recognition  
125 motif for Anr are shown by blue and red boxes, respectively<sup>21</sup>. The Anr consensus motif<sup>56</sup> is  
126 shown below.

127 b Total RNA was isolated from B-96 cultures of PA14, PA14*anr*- and PA14*rpoN*-, and 10 µg  
128 of total RNA was used for the Northern-blot analysis. 5S rRNA served as a loading control.

129



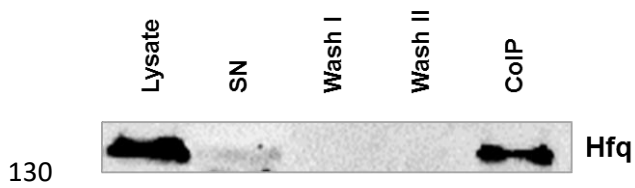

131 **Supplementary Figure S3. Presence of Hfq in different steps during co-**  
132 **immunoprecipitation.**

133 Samples were withdrawn from lysates of B-96 cultures during different steps of co-  
134 immunoprecipitation with Hfq-specific antibodies and examined by western-blotting for the  
135 presence of Hfq as described in Supplementary text. Lysate: initial lysate (input); SN  
136 (supernatant, Hfq-unbound fraction); wash I and II represent washing fractions; CoIP (co-  
137 immunoprecipitate, Hfq bound fraction).

138

a

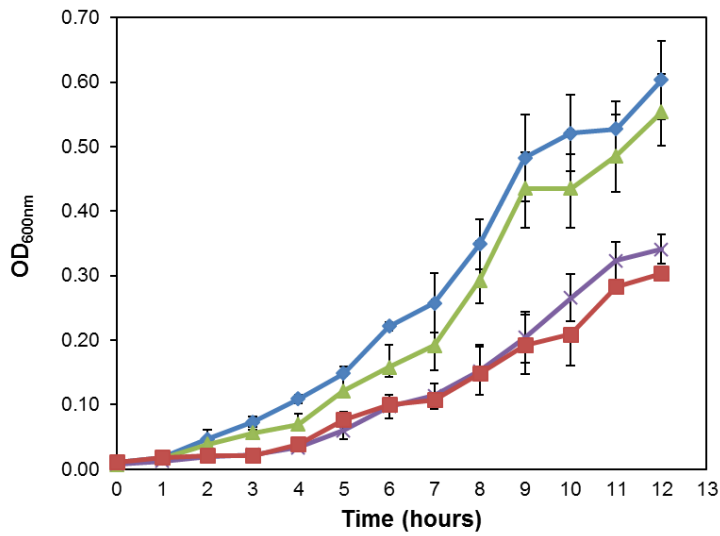

b

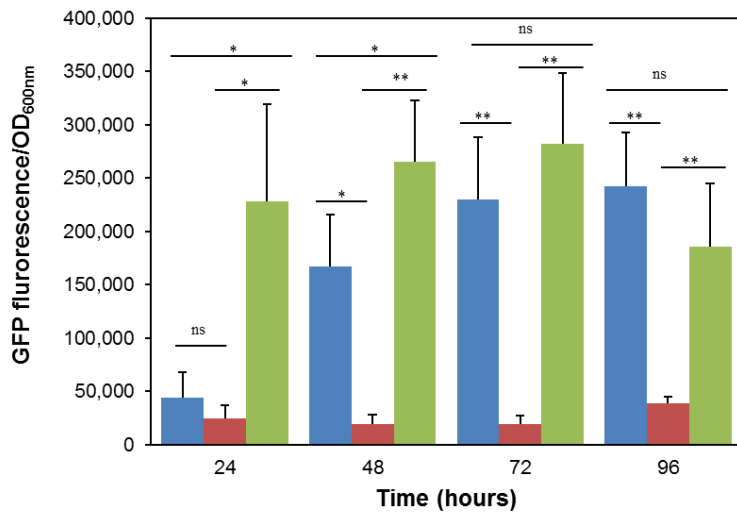

139

140 **Supplementary Figure S4. Hfq is pivotal for anoxic growth and metabolism.**

141 a The strains PA14 (blue bar), PA14ΔcrcZ (green bar), PA14(pcrcZ) (violet bar) and  
142 PA14Δhfq (red bar), were grown anaerobically for 12 hours in SCFM. Cell growth was  
143 monitored by measuring the optical density at 600 nm (OD<sub>600nm</sub>).

144 b Metabolic activity of strains PA14 (blue bar), PA14Δhfq (red bar) and PA14ΔcrcZ (green  
145 bar) monitored with the PrmBP1-gfp(AGA) bioreporter after growth in SCF-medium. The  
146 synthesis of Gfp (excitation, 488 nm; emission, 517 nm), as well as the OD<sub>600</sub> was measured  
147 every 24 h for 4 days. Error bars, mean ± s.d. from a representative of three independent

148 experiments. N = 3 biological replicates. ns (non-significant), \*  $P < 0.05$ , \*\*  $P < 0.01$ ,  
149 analysed by one-way ANOVA with the Tukey's HSD post hoc test.

150

a

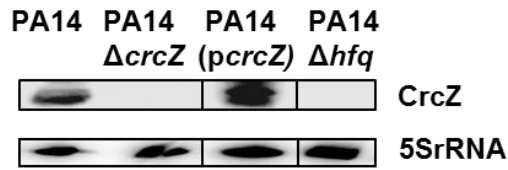

b

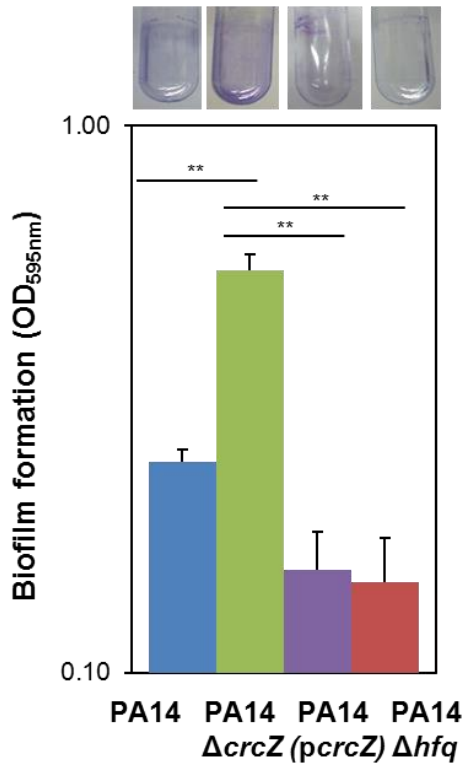

151

152 **Supplementary Figure S5. Biofilm formation of B-96 cultures of PA14, PA14Δ*crcZ*,**  
153 **PA14(*pcrcZ*) and PA14Δ*hfq*.**

154 a Steady-state levels of CrcZ in B-96 cultures of PA14, PA14Δ*crcZ*, PA14(*pcrcZ*) and  
155 PA14Δ*hfq* (see also Fig. 4a). 10 μg of total RNA was used for the Northern-blot analysis with  
156 the CrcZ specific probe. 5SrRNA served as a loading control.

157 b Top, biofilm formation was assessed by a crystal violet assay. Bottom, graphical  
158 representation of the results obtained with B-96 cultures of PA14 (blue bar), PA14Δ*crcZ*  
159 (green bar), PA14(*pcrcZ*) (violet bar) and PA14Δ*hfq* (red bar). Error bars, mean ± s.d. from a

160 representative of three independent experiments. N = 3 biological replicates with 3 technical  
161 replicates. \*\*  $P < 0.01$ , analysed by one-way ANOVA with the Tukey's HSD post hoc test.

162

163 **Supplementary Table S1. Known and putative regulatory RNAs found in the Hfq-**  
164 **bound and unbound fraction.** All RNAs with less than 150 reads were excluded.

| sRNA_id <sup>a</sup>            | Start <sup>b</sup> | End <sup>c</sup> | Strand <sup>d</sup> | Hfq bound <sup>e</sup><br>fraction | Hfq unbound <sup>e</sup><br>fraction |
|---------------------------------|--------------------|------------------|---------------------|------------------------------------|--------------------------------------|
| CrcZ_igr2625 (SPA0092)          | 5580518            | 5580924          | +                   | 2028048                            | 29087                                |
| SPA0072 (tmRNA_ssrA)            | 4749699            | 4750100          | +                   | 368491                             | 93138                                |
| SPA0094<br>(6SRNA_ssrS_igr2888) | 6156499            | 6156800          | +                   | 45301                              | 51387                                |
| SPA0091 (rnpB)                  | 5119799            | 5120100          | -                   | 39037                              | 25631                                |
| P30                             | 5580674            | 5580896          | -                   | 24961                              | 789                                  |
| SPA0085 (RsmZ)                  | 1500299            | 1500500          | +                   | 5413                               | 70581                                |
| SPA0069 (RsmY)                  | 596799             | 597000           | +                   | 4968                               | 17203                                |
| SPA0011                         | 2677699            | 2678200          | +                   | 2271                               | 2425                                 |
| SPA0012                         | 3515399            | 3515700          | +                   | 2002                               | 367                                  |
| SPA0142                         | 139699             | 140100           | +                   | 1582                               | 64                                   |
| SPA0104                         | 1651699            | 1651900          | +                   | 1572                               | 269                                  |
| SPA0105                         | 1648399            | 1649100          | +                   | 1475                               | 51                                   |
| SPA0021                         | 5288099            | 5288500          | +                   | 848                                | 257                                  |
| rgsA_igr1076 (P16)              | 2250484            | 2250742          | -                   | 744                                | 209                                  |
| SPA0122 (ErsA)                  | 6456399            | 6456600          | -                   | 734                                | 89                                   |
| SPA0076f (4.5S_igr1863)         | 3975599            | 3975800          | -                   | 637                                | 1024                                 |
| large_SRP                       | 3975616            | 3975841          | -                   | 635                                | 1024                                 |
| SPA0124                         | 4105199            | 4105600          | -                   | 623                                | 657                                  |
| PA14sr_035 (igr576)             | 1198079            | 1199053          | -                   | 608                                | 171                                  |
| PA14sr_090                      | 3601259            | 3601463          | -                   | 560                                | 42                                   |
| igr1766                         | 3758216            | 3764041          | +                   | 559                                | 1                                    |
| SPA0178                         | 894999             | 895300           | -                   | 533                                | 45                                   |
| igr1944                         | 4155629            | 4160668          | +                   | 522                                | 1                                    |
| SPA0145                         | 1774199            | 1774400          | -                   | 518                                | 24                                   |
| SPA0013                         | 3974899            | 3975200          | -                   | 461                                | 20                                   |
| SPA0025                         | 2935699            | 2937400          | -                   | 358                                | 2147                                 |
| igr1276                         | 2604153            | 2604747          | -                   | 346                                | 51                                   |
| SPA0147                         | 2236399            | 2237000          | -                   | 279                                | 63                                   |
| SPA0126                         | 1836399            | 1836900          | -                   | 250                                | 3                                    |
| igr329                          | 642266             | 643346           | -                   | 231                                | 13                                   |
| SPA0073 (sRNA 645)              | 4444699            | 4445000          | +                   | 202                                | 20                                   |
| SPA0125                         | 2464699            | 2465200          | +                   | 200                                | 22                                   |
| SPA0119                         | 5951199            | 5952700          | -                   | 197                                | 1                                    |
| SPA0166                         | 4085299            | 4085600          | +                   | 184                                | 6                                    |
| SPA0117                         | 2154399            | 2154700          | -                   | 178                                | 8                                    |
| PA14sr_078                      | 2924519            | 2925530          | -                   | 173                                | 1                                    |
| PA14sr_065                      | 2465066            | 2465518          | +                   | 172                                | 36                                   |
| SPA0121                         | 6444599            | 6445100          | -                   | 169                                | 36                                   |

165 <sup>a-d</sup> Annotation based on location information according to<sup>17</sup>. <sup>e</sup> Sequencing reads averaged from two independent experiments.

166

167 **Supplementary Table S2. Differential abundance of transcripts in B-96 cultures of**  
 168 **PA14 and PA14Δ*hfq*.**

169 a Transcripts with increased abundance in B-96 cultures of PA14Δ*hfq* when compared with  
 170 PA14. A fold change cut-off of 4 and a p-value above 0.05 were applied. The colour coding  
 171 of different functional classes corresponds to those shown in Fig. 2a.

| PA14_id <sup>b</sup>                                             | Gene <sup>c</sup> | Description <sup>d</sup>                                | Fold Change | log2Fold Change | pval      | padj      |
|------------------------------------------------------------------|-------------------|---------------------------------------------------------|-------------|-----------------|-----------|-----------|
| <b>Adaptation, Protection</b>                                    |                   |                                                         |             |                 |           |           |
| PA14_33690                                                       | <i>pvdE</i>       | pyoverdine biosynthesis protein PvdE                    | 4.05        | 2.02            | 1.83E-33  | 4.44E-32  |
| PA14_49410                                                       |                   | cold-shock protein                                      | 5.50        | 2.46            | 3.90E-58  | 2.37E-56  |
| PA14_58000                                                       | <i>sodM</i>       | superoxide dismutase                                    | 6.87        | 2.78            | 1.23E-20  | 1.54E-19  |
| <b>Amino acid biosynthesis and metabolism</b>                    |                   |                                                         |             |                 |           |           |
| PA14_05750                                                       | <i>glxX</i>       | oxidoreductase                                          | 17.34       | 4.12            | 9.97E-49  | 4.38E-47  |
| PA14_37560                                                       | <i>asnB</i>       | asparagine synthetase, glutamine-hydrolysing            | 7.84        | 2.97            | 1.77E-81  | 1.93E-79  |
| PA14_69990                                                       | <i>dadX</i>       | alanine racemase                                        | 7.04        | 2.82            | 8.54E-41  | 2.86E-39  |
| PA14_71180                                                       |                   | acetylornithine deacetylase                             | 4.21        | 2.07            | 8.97E-12  | 6.13E-11  |
| PA14_73090                                                       |                   | hypothetical protein                                    | 6.56        | 2.71            | 1.71E-39  | 5.35E-38  |
| <b>Glycine and serine degradation</b>                            |                   |                                                         |             |                 |           |           |
| PA14_32985                                                       | <i>gcvH2</i>      | glycine cleavage system protein H                       | 10.22       | 3.35            | 3.36E-62  | 2.25E-60  |
| PA14_33000                                                       | <i>gcvP2</i>      | glycine dehydrogenase                                   | 6.92        | 2.79            | 5.04E-75  | 4.72E-73  |
| PA14_33010                                                       | <i>glyA2</i>      | serine hydroxymethyltransferase                         | 7.43        | 2.89            | 1.28E-72  | 1.11E-70  |
| PA14_33030                                                       | <i>sdaA</i>       | L-serine dehydratase                                    | 4.50        | 2.17            | 1.33E-41  | 4.55E-40  |
| <b>Branched-chain amino acid degradation</b>                     |                   |                                                         |             |                 |           |           |
| PA14_18120                                                       | <i>mmsA</i>       | methylmalonate-semialdehyde dehydrogenase               | 42.80       | 5.42            | 1.44E-227 | 1.69E-224 |
| PA14_18140                                                       | <i>mmsB</i>       | 3-hydroxyisobutyrate dehydrogenase                      | 74.19       | 6.21            | 5.91E-203 | 4.35E-200 |
| PA14_35490                                                       | <i>lpdV</i>       | dihydrolipoamide dehydrogenase                          | 19.24       | 4.27            | 1.35E-142 | 3.32E-140 |
| PA14_35500                                                       | <i>bkdB</i>       | branched-chain alpha-keto acid dehydrogenase subunit E2 | 31.43       | 4.97            | 5.92E-152 | 1.66E-149 |
| PA14_35520                                                       | <i>bkdA2</i>      | 2-oxoisovalerate dehydrogenase subunit beta             | 12.91       | 3.69            | 1.22E-49  | 5.47E-48  |
| PA14_35530                                                       | <i>bkdA1</i>      | 2-oxoisovalerate dehydrogenase subunit alpha            | 7.36        | 2.88            | 9.55E-44  | 3.57E-42  |
| PA14_19920                                                       |                   | branched-chain alpha-keto acid dehydrogenase subunit E2 | 5.93        | 2.57            | 6.34E-35  | 1.63E-33  |
| <b>Biosynthesis of cofactors, prosthetic groups and carriers</b> |                   |                                                         |             |                 |           |           |
| PA14_02420                                                       | <i>atsK</i>       | hypothetical protein                                    | 55.33       | 5.79            | 9.83E-176 | 5.27E-173 |
| PA14_13850                                                       | <i>moaA</i>       | molybdenum cofactor                                     | 3.88        | 1.95            | 2.16E-09  | 1.17E-08  |

|                                             |              |                                                        |       |      |           |           |  |
|---------------------------------------------|--------------|--------------------------------------------------------|-------|------|-----------|-----------|--|
|                                             |              | biosynthesis protein A                                 |       |      |           |           |  |
| PA14_20140                                  | <i>fpr</i>   | ferredoxin--NADP+ reductase                            | 7.80  | 2.96 | 3.12E-84  | 3.75E-82  |  |
| PA14_31510                                  |              | short-chain dehydrogenase                              | 5.57  | 2.48 | 1.21E-20  | 1.53E-19  |  |
| PA14_61750                                  | <i>ipk</i>   | 4-diphosphocytidyl-2-C-methyl-D-erythritol kinase      | 5.51  | 2.46 | 2.08E-60  | 1.32E-58  |  |
| PA14_66550                                  | <i>hemE</i>  | uroporphyrinogen decarboxylase                         | 4.83  | 2.27 | 7.76E-38  | 2.25E-36  |  |
| <b>PQQ biosynthesis</b>                     |              |                                                        |       |      |           |           |  |
| PA14_38780                                  | <i>pqqE</i>  | pyrroloquinoline quinone biosynthesis protein PqqE     | 6.55  | 2.71 | 2.45E-65  | 1.72E-63  |  |
| PA14_38790                                  | <i>pqqD</i>  | pyrroloquinoline quinone biosynthesis protein PqqD     | 5.93  | 2.57 | 1.97E-46  | 8.06E-45  |  |
| PA14_38800                                  | <i>pqqC</i>  | pyrroloquinoline quinone biosynthesis protein PqqC     | 5.73  | 2.52 | 1.07E-19  | 1.28E-18  |  |
| PA14_38820                                  | <i>pqqB</i>  | pyrroloquinoline quinone biosynthesis protein PqqB     | 7.75  | 2.95 | 2.58E-71  | 2.14E-69  |  |
| PA14_38825                                  | <i>pqqA</i>  | coenzyme PQQ synthesis protein PqqA                    | 10.33 | 3.37 | 1.15E-13  | 9.14E-13  |  |
| <b>Carbon compound catabolism</b>           |              |                                                        |       |      |           |           |  |
| PA14_02760                                  | <i>catI</i>  | CoA transferase, subunit A                             | 4.04  | 2.01 | 9.05E-10  | 5.13E-09  |  |
| PA14_20560                                  | <i>amiE</i>  | acylamide amidohydrolase                               | 6.29  | 2.65 | 7.06E-56  | 3.96E-54  |  |
| PA14_32160                                  | <i>antA</i>  | anthranilate dioxygenase large subunit                 | 8.73  | 3.13 | 1.83E-25  | 2.97E-24  |  |
| PA14_37550                                  |              | ring-hydroxylating dioxygenase small subunit           | 8.30  | 3.05 | 7.68E-44  | 2.90E-42  |  |
| PA14_37570                                  |              | ring-hydroxylating dioxygenase, large terminal subunit | 14.33 | 3.84 | 1.79E-127 | 3.90E-125 |  |
| PA14_38590                                  | <i>bdhA</i>  | 3-hydroxybutyrate dehydrogenase                        | 6.38  | 2.67 | 1.60E-64  | 1.11E-62  |  |
| PA14_70640                                  | <i>rubA1</i> | rubredoxin 1                                           | 6.91  | 2.79 | 3.50E-53  | 1.82E-51  |  |
| <b>Malonate metabolism</b>                  |              |                                                        |       |      |           |           |  |
| PA14_02580                                  | <i>mdcD</i>  | malonate decarboxylase subunit beta                    | 4.55  | 2.19 | 9.33E-17  | 9.36E-16  |  |
| PA14_02590                                  | <i>mdcE</i>  | malonate decarboxylase subunit gamma                   | 8.21  | 3.04 | 2.05E-52  | 1.01E-50  |  |
| <b>Central intermediary metabolism</b>      |              |                                                        |       |      |           |           |  |
| PA14_09290                                  | <i>pchG</i>  | pyochelin biosynthetic protein PchG                    | 3.89  | 1.96 | 4.08E-11  | 2.61E-10  |  |
| PA14_36330                                  | <i>hcnA</i>  | hydrogen cyanide synthase HcnA                         | 4.30  | 2.10 | 9.90E-33  | 2.31E-31  |  |
| PA14_40040                                  |              | hypothetical protein                                   | 60.18 | 5.91 | 8.52E-197 | 5.57E-194 |  |
| PA14_46960                                  | <i>ggt</i>   | gamma-glutamyltranspeptidase                           | 4.13  | 2.05 | 7.56E-24  | 1.13E-22  |  |
| <b>Sulfur metabolism</b>                    |              |                                                        |       |      |           |           |  |
| PA14_02310                                  | <i>atsA</i>  | arylsulfatase                                          | 23.06 | 4.53 | 1.76E-154 | 5.45E-152 |  |
| PA14_40770                                  | <i>cysI</i>  | sulfite reductase                                      | 4.43  | 2.15 | 2.60E-46  | 1.06E-44  |  |
| <b>Chaperones &amp; heat shock proteins</b> |              |                                                        |       |      |           |           |  |
| PA14_20570                                  | <i>amiB</i>  | chaperone                                              | 7.39  | 2.88 | 8.11E-36  | 2.18E-34  |  |



| <b>Chemotaxis</b>                                              |               |                                                         |       |      |           |           |
|----------------------------------------------------------------|---------------|---------------------------------------------------------|-------|------|-----------|-----------|
| PA14_55960                                                     | <i>pctC</i>   | chemotactic transducer<br>PctC                          | 5.93  | 2.57 | 3.73E-08  | 1.78E-07  |
| <b>Che operon</b>                                              |               |                                                         |       |      |           |           |
| PA14_02180                                                     | <i>cheB</i>   | chemotaxis-specific<br>methyltransferase                | 8.09  | 3.02 | 6.74E-32  | 1.52E-30  |
| PA14_02190                                                     | <i>cheD</i>   | hypothetical protein                                    | 16.43 | 4.04 | 3.07E-57  | 1.85E-55  |
| PA14_02200                                                     | <i>cheR</i>   | chemotaxis protein<br>methyltransferase                 | 16.67 | 4.06 | 5.26E-83  | 6.08E-81  |
| PA14_02220                                                     |               | chemotaxis transducer                                   | 13.31 | 3.73 | 3.76E-114 | 6.71E-112 |
| PA14_02230                                                     | <i>cheW</i>   | purine-binding<br>chemotaxis protein                    | 12.38 | 3.63 | 9.85E-73  | 8.66E-71  |
| <b>DNA replication, recombination, modification and repair</b> |               |                                                         |       |      |           |           |
| PA14_70600                                                     | <i>hupA</i>   | HU family DNA-binding<br>protein                        | 3.92  | 1.97 | 1.51E-07  | 6.84E-07  |
| <b>Energy metabolism</b>                                       |               |                                                         |       |      |           |           |
| PA14_65080                                                     | <i>ygiR</i>   | hypothetical protein                                    | 3.95  | 1.98 | 2.26E-37  | 6.37E-36  |
| PA14_65810                                                     |               | hypothetical protein                                    | 6.22  | 2.64 | 5.39E-23  | 7.61E-22  |
| PA14_02450                                                     |               | NAD(P) transhydrogenase<br>subunit alpha part 1         | 4.69  | 2.23 | 8.67E-30  | 1.80E-28  |
| PA14_02470                                                     | <i>pntB</i>   | pyridine nucleotide<br>transhydrogenase subunit<br>beta | 4.95  | 2.31 | 2.78E-29  | 5.57E-28  |
| PA14_02680                                                     | <i>aldH</i>   | aldehyde dehydrogenase                                  | 15.71 | 3.97 | 4.76E-17  | 4.86E-16  |
| PA14_38750                                                     |               | iron-containing alcohol<br>dehydrogenase                | 5.68  | 2.51 | 7.86E-60  | 4.87E-58  |
| <b>Pyruvate metabolism</b>                                     |               |                                                         |       |      |           |           |
| PA14_19910                                                     | <i>pdhB</i>   | pyruvate dehydrogenase<br>E1 component, beta chain      | 4.23  | 2.08 | 6.05E-13  | 4.54E-12  |
| PA14_71720                                                     | <i>oadA</i>   | pyruvate carboxylase<br>subunit B                       | 6.54  | 2.71 | 8.97E-67  | 6.77E-65  |
| PA14_71740                                                     | <i>accC</i>   | acetyl-CoA carboxylase<br>biotin carboxylase subunit    | 8.12  | 3.02 | 2.75E-53  | 1.45E-51  |
| <b>Cytochrome c oxidases</b>                                   |               |                                                         |       |      |           |           |
| PA14_01300                                                     | <i>coxA</i>   | cytochrome c oxidase<br>subunit I                       | 6.51  | 2.70 | 1.22E-46  | 5.11E-45  |
| PA14_01310                                                     | <i>coxG</i>   | cytochrome C oxidase<br>assembly protein                | 10.69 | 3.42 | 5.89E-38  | 1.72E-36  |
| PA14_01320                                                     | <i>coIII</i>  | cytochrome c oxidase<br>subunit III                     | 8.67  | 3.12 | 8.97E-54  | 4.81E-52  |
| PA14_40510                                                     | <i>ccoN-2</i> | cbb3-type cytochrome c<br>oxidase subunit I             | 9.35  | 3.23 | 2.62E-37  | 7.36E-36  |
| PA14_44340                                                     | <i>ccoN</i>   | cbb3-type cytochrome c<br>oxidase subunit I             | 8.50  | 3.09 | 1.47E-82  | 1.67E-80  |
| PA14_44350                                                     | <i>ccoO</i>   | cbb3-type cytochrome c<br>oxidase subunit II            | 13.84 | 3.79 | 2.69E-102 | 4.06E-100 |
| PA14_44360                                                     | <i>ccoP</i>   | cytochrome c oxidase,<br>cbb3-type subunit III          | 10.57 | 3.40 | 4.34E-89  | 5.56E-87  |
| PA14_44370                                                     | <i>ccoN</i>   | cbb3-type cytochrome c<br>oxidase subunit I             | 5.27  | 2.40 | 2.07E-37  | 5.89E-36  |
| PA14_45330                                                     | <i>ccmE</i>   | cytochrome c-type<br>biogenesis protein CcmE            | 3.97  | 1.99 | 1.71E-05  | 6.02E-05  |
| PA14_57560                                                     |               | cytochrome b                                            | 4.06  | 2.02 | 7.85E-41  | 2.64E-39  |
| PA14_60700                                                     | <i>ccpR</i>   | cytochrome c551<br>peroxidase                           | 6.39  | 2.68 | 2.51E-54  | 1.37E-52  |

**Ethanol oxidation**

|            |             |                                                 |        |      |               |               |
|------------|-------------|-------------------------------------------------|--------|------|---------------|---------------|
| PA14_38840 | <i>exaC</i> | NAD+ dependent<br>acetaldehyde<br>dehydrogenase | 127.05 | 6.99 | 7.40E-<br>255 | 1.45E-<br>251 |
| PA14_38850 | <i>exaB</i> | cytochrome c550                                 | 169.04 | 7.40 | 6.78E-<br>160 | 2.35E-<br>157 |
| PA14_38860 | <i>exaA</i> | quinoprotein alcohol<br>dehydrogenase           | 260.81 | 8.03 | 0.00E+00      | 0.00E+00      |

**Denitrification (*nor* operon; nitric-oxide reductase)**

|            |             |                                     |      |      |          |          |
|------------|-------------|-------------------------------------|------|------|----------|----------|
| PA14_06810 | <i>norC</i> | nitric-oxide reductase<br>subunit C | 3.89 | 1.96 | 5.89E-19 | 6.76E-18 |
| PA14_06830 | <i>norB</i> | nitric-oxide reductase<br>subunit B | 4.47 | 2.16 | 8.15E-38 | 2.35E-36 |
| PA14_06840 | <i>norD</i> | dinitrification protein<br>NorD     | 4.64 | 2.21 | 9.57E-11 | 5.95E-10 |
| PA14_11690 | <i>ppa</i>  | inorganic<br>pyrophosphatase        | 3.98 | 1.99 | 2.21E-13 | 1.72E-12 |

**Denitrification (*nar* operon; membrane-bound nitrate reductase)**

|            |             |                                              |      |      |          |          |
|------------|-------------|----------------------------------------------|------|------|----------|----------|
| PA14_13780 | <i>narG</i> | respiratory nitrate<br>reductase alpha subun | 4.53 | 2.18 | 4.04E-45 | 1.61E-43 |
| PA14_13800 | <i>narH</i> | respiratory nitrate<br>reductase beta subuni | 5.35 | 2.42 | 4.42E-53 | 2.28E-51 |
| PA14_13810 | <i>narJ</i> | respiratory nitrate<br>reductase delta chain | 4.47 | 2.16 | 1.32E-30 | 2.85E-29 |
| PA14_13830 | <i>narI</i> | respiratory nitrate<br>reductase gamma chain | 5.20 | 2.38 | 2.43E-38 | 7.25E-37 |

**Denitrification (*nap* operon; periplasmic nitrate reductase)**

|            |             |                                                     |       |      |          |          |
|------------|-------------|-----------------------------------------------------|-------|------|----------|----------|
| PA14_49210 | <i>napE</i> | periplasmic nitrate<br>reductase NapE               | 4.34  | 2.12 | 1.13E-27 | 2.03E-26 |
| PA14_49230 | <i>napD</i> | NapD protein of<br>periplasmic nitrate<br>reductase | 4.03  | 2.01 | 1.46E-09 | 8.07E-09 |
| PA14_49250 | <i>napA</i> | nitrate reductase catalytic<br>subunit              | 7.81  | 2.96 | 2.87E-69 | 2.32E-67 |
| PA14_49260 | <i>napB</i> | cytochrome c-type protein<br>NapB precursor         | 11.05 | 3.47 | 1.72E-40 | 5.66E-39 |
| PA14_49270 | <i>napC</i> | cytochrome c-type protein<br>NapC                   | 11.71 | 3.55 | 1.41E-56 | 8.31E-55 |

**TCA cycle**

|            |             |                    |      |      |          |          |
|------------|-------------|--------------------|------|------|----------|----------|
| PA14_58030 | <i>fumC</i> | fumarate hydratase | 4.17 | 2.06 | 1.12E-42 | 3.95E-41 |
|------------|-------------|--------------------|------|------|----------|----------|

**ATP-synthase**

|            |             |                                |      |      |          |          |
|------------|-------------|--------------------------------|------|------|----------|----------|
| PA14_73310 | <i>atpB</i> | F0F1 ATP synthase<br>subunit A | 4.03 | 2.01 | 4.45E-40 | 1.43E-38 |
| PA14_73320 | <i>atpI</i> | F0F1 ATP synthase<br>subunit I | 4.85 | 2.28 | 2.88E-48 | 1.23E-46 |

**Fatty acid and phospholipid metabolism**

|            |             |                        |        |      |               |               |
|------------|-------------|------------------------|--------|------|---------------|---------------|
| PA14_18150 | <i>acsL</i> | acetyl-coa synthetase  | 15.93  | 3.99 | 9.47E-<br>136 | 2.23E-<br>133 |
| PA14_31530 |             | acyl-CoA thiolase      | 4.96   | 2.31 | 6.03E-07      | 2.55E-06      |
| PA14_39990 |             | hypothetical protein   | 113.00 | 6.82 | 1.01E-<br>252 | 1.49E-<br>249 |
| PA14_65820 |             | acyl-CoA dehydrogenase | 7.40   | 2.89 | 1.07E-11      | 7.24E-11      |
| PA14_69660 | <i>lppL</i> | lipopeptide LppL       | 4.34   | 2.12 | 4.33E-05      | 1.46E-04      |

**Hypothetical, unclassified, unknown**

|            |  |                      |       |      |               |               |
|------------|--|----------------------|-------|------|---------------|---------------|
| PA14_01340 |  | hypothetical protein | 9.41  | 3.23 | 1.41E-35      | 3.71E-34      |
| PA14_04020 |  | hypothetical protein | 5.99  | 2.58 | 1.99E-40      | 6.48E-39      |
| PA14_05110 |  | hypothetical protein | 5.30  | 2.41 | 1.56E-12      | 1.14E-11      |
| PA14_07355 |  | hypothetical protein | 37.61 | 5.23 | 1.88E-<br>186 | 1.11E-<br>183 |
| PA14_07370 |  | hypothetical protein | 5.44  | 2.44 | 1.31E-29      | 2.64E-28      |

|            |             |                      |        |      |           |           |
|------------|-------------|----------------------|--------|------|-----------|-----------|
| PA14_07650 | <i>ycgB</i> | SpoVR family protein | 6.12   | 2.61 | 2.13E-32  | 4.88E-31  |
| PA14_07660 |             | hypothetical protein | 4.55   | 2.18 | 6.62E-43  | 2.38E-41  |
| PA14_13920 |             | hypothetical protein | 4.14   | 2.05 | 5.32E-15  | 4.68E-14  |
| PA14_14540 |             | hypothetical protein | 3.98   | 1.99 | 2.28E-23  | 3.33E-22  |
| PA14_20840 |             | hypothetical protein | 4.00   | 2.00 | 5.10E-25  | 8.09E-24  |
| PA14_28390 |             | hypothetical protein | 10.41  | 3.38 | 9.75E-42  | 3.38E-40  |
| PA14_29470 |             | hypothetical protein | 6.22   | 2.64 | 9.62E-43  | 3.41E-41  |
| PA14_34050 |             | hypothetical protein | 4.89   | 2.29 | 1.49E-18  | 1.66E-17  |
| PA14_34070 |             | hypothetical protein | 3.90   | 1.96 | 9.37E-24  | 1.39E-22  |
| PA14_34080 |             | hypothetical protein | 4.08   | 2.03 | 7.09E-10  | 4.06E-09  |
| PA14_34100 |             | hypothetical protein | 4.19   | 2.07 | 1.42E-09  | 7.86E-09  |
| PA14_34130 |             | hypothetical protein | 5.29   | 2.40 | 1.36E-46  | 5.65E-45  |
| PA14_37410 |             | hypothetical protein | 3.87   | 1.95 | 2.35E-25  | 3.80E-24  |
| PA14_37520 |             | hypothetical protein | 4.83   | 2.27 | 2.27E-28  | 4.27E-27  |
| PA14_38880 |             | hypothetical protein | 505.05 | 8.98 | 6.91E-175 | 3.13E-172 |
| PA14_38920 |             | hypothetical protein | 29.89  | 4.90 | 5.09E-124 | 1.07E-121 |
| PA14_38990 |             | hypothetical protein | 32.29  | 5.01 | 1.70E-170 | 6.69E-168 |
| PA14_39000 |             | hypothetical protein | 58.99  | 5.88 | 6.05E-20  | 7.36E-19  |
| PA14_40010 |             | hypothetical protein | 155.00 | 7.28 | 8.30E-271 | 2.44E-267 |
| PA14_40020 |             | hypothetical protein | 46.22  | 5.53 | 2.12E-175 | 1.04E-172 |
| PA14_40050 |             | hypothetical protein | 38.89  | 5.28 | 8.11E-112 | 1.40E-109 |
| PA14_40100 |             | hypothetical protein | 4.94   | 2.30 | 6.08E-30  | 1.28E-28  |
| PA14_40110 |             | hypothetical protein | 4.94   | 2.30 | 1.08E-09  | 6.04E-09  |
| PA14_40520 |             | hypothetical protein | 4.54   | 2.18 | 4.70E-16  | 4.46E-15  |
| PA14_40560 |             | hypothetical protein | 7.21   | 2.85 | 8.85E-69  | 6.86E-67  |
| PA14_40750 |             | hypothetical protein | 4.62   | 2.21 | 5.04E-22  | 6.75E-21  |
| PA14_40780 |             | hypothetical protein | 4.27   | 2.09 | 8.71E-40  | 2.76E-38  |
| PA14_41760 |             | hypothetical protein | 4.08   | 2.03 | 3.03E-19  | 3.54E-18  |
| PA14_41790 |             | hypothetical protein | 5.53   | 2.47 | 3.34E-37  | 9.31E-36  |
| PA14_42410 |             | hypothetical protein | 8.04   | 3.01 | 7.81E-52  | 3.77E-50  |
| PA14_44430 |             | hypothetical protein | 4.65   | 2.22 | 9.04E-43  | 3.23E-41  |
| PA14_46380 |             | hypothetical protein | 4.07   | 2.03 | 1.22E-16  | 1.21E-15  |
| PA14_46390 |             | hypothetical protein | 5.20   | 2.38 | 5.00E-23  | 7.12E-22  |
| PA14_47410 | <i>ycgN</i> | hypothetical protein | 4.94   | 2.31 | 4.32E-21  | 5.53E-20  |
| PA14_49850 |             | hypothetical protein | 4.11   | 2.04 | 6.53E-12  | 4.56E-11  |
| PA14_51940 |             | hypothetical protein | 5.06   | 2.34 | 3.20E-21  | 4.14E-20  |
| PA14_51950 |             | hypothetical protein | 4.44   | 2.15 | 6.76E-35  | 1.73E-33  |
| PA14_52910 |             | hypothetical protein | 10.54  | 3.40 | 2.00E-14  | 1.69E-13  |
| PA14_54870 |             | hypothetical protein | 3.91   | 1.97 | 7.75E-39  | 2.37E-37  |
| PA14_55760 |             | hypothetical protein | 3.89   | 1.96 | 5.51E-08  | 2.59E-07  |
| PA14_58010 |             | hypothetical protein | 5.29   | 2.40 | 7.86E-50  | 3.56E-48  |
| PA14_60480 |             | hypothetical protein | 8.62   | 3.11 | 1.49E-72  | 1.28E-70  |
| PA14_68620 |             | hypothetical protein | 4.44   | 2.15 | 8.03E-33  | 1.89E-31  |
| PA14_71190 |             | hypothetical protein | 38.36  | 5.26 | 5.70E-21  | 7.25E-20  |

### Membrane proteins

|            |             |                                  |       |      |           |           |
|------------|-------------|----------------------------------|-------|------|-----------|-----------|
| PA14_02060 |             | hypothetical protein             | 5.32  | 2.41 | 5.75E-04  | 1.61E-03  |
| PA14_22350 | <i>actP</i> | acetate permease                 | 5.30  | 2.41 | 1.18E-44  | 4.57E-43  |
| PA14_28400 | <i>oprQ</i> | outer membrane OprD family porin | 12.21 | 3.61 | 1.40E-121 | 2.65E-119 |
| PA14_29660 |             | hypothetical protein             | 4.22  | 2.08 | 3.02E-08  | 1.46E-07  |
| PA14_32720 |             | transmembrane sensor             | 5.21  | 2.38 | 6.05E-29  | 1.20E-27  |
| PA14_38950 |             | hypothetical protein             | 27.61 | 4.79 | 9.52E-133 | 2.16E-130 |
| PA14_39810 |             | transmembrane sensor             | 5.21  | 2.38 | 6.15E-36  | 1.68E-34  |
| PA14_39830 |             | hypothetical protein             | 4.34  | 2.12 | 2.20E-15  | 1.99E-14  |
| PA14_40540 |             | hypothetical protein             | 5.68  | 2.51 | 2.39E-33  | 5.78E-32  |
| PA14_46650 |             | transmembrane sensor             | 4.63  | 2.21 | 1.85E-29  | 3.73E-28  |
| PA14_64690 |             | transmembrane sensor             | 4.83  | 2.27 | 4.54E-38  | 1.34E-36  |

### Motility & Attachment

#### Type IV pili

|            |             |                                         |      |      |          |          |
|------------|-------------|-----------------------------------------|------|------|----------|----------|
| PA14_05190 | <i>pilU</i> | twitching motility protein PilU         | 4.28 | 2.10 | 4.58E-11 | 2.92E-10 |
| PA14_05340 | <i>pilI</i> | twitching motility protein PilI         | 4.18 | 2.06 | 1.68E-27 | 2.98E-26 |
| PA14_05380 | <i>pilK</i> | methyltransferase PilK                  | 3.92 | 1.97 | 8.85E-29 | 1.71E-27 |
| PA14_58730 | <i>pilA</i> | type IV pilin structural subunit        | 3.93 | 1.97 | 3.10E-39 | 9.60E-38 |
| PA14_66630 | <i>pilP</i> | type 4 fimbrial biogenesis protein PilP | 5.09 | 2.35 | 1.05E-22 | 1.45E-21 |

#### Nucleotide biosynthesis and metabolism

|            |              |                                                |       |      |          |          |
|------------|--------------|------------------------------------------------|-------|------|----------|----------|
| PA14_05740 | <i>pydA</i>  | dihydropyrimidine dehydrogenase                | 31.43 | 4.97 | 1.42E-76 | 1.39E-74 |
| PA14_05770 | <i>dhT</i>   | phenylhydantoinase                             | 6.50  | 2.70 | 2.84E-61 | 1.86E-59 |
| PA14_05790 |              | transporter                                    | 6.49  | 2.70 | 4.35E-15 | 3.84E-14 |
| PA14_05810 | <i>amaB</i>  | allantoate amidohydrolase                      | 5.47  | 2.45 | 1.21E-31 | 2.71E-30 |
| PA14_44740 | <i>xdhB</i>  | xanthine dehydrogenase                         | 6.73  | 2.75 | 7.95E-51 | 3.74E-49 |
| PA14_44760 |              | xanthine dehydrogenase accessory factor X      | 4.49  | 2.17 | 1.20E-24 | 1.86E-23 |
| PA14_53290 | <i>trxB2</i> | thioredoxin reductase 2                        | 3.87  | 1.95 | 5.64E-10 | 3.27E-09 |
| PA14_61460 | <i>hpt</i>   | hypoxanthine-guanine phosphoribosyltransferase | 3.97  | 1.99 | 1.12E-15 | 1.03E-14 |
| PA14_61770 | <i>prs</i>   | ribose-phosphate pyrophosphokinase             | 3.87  | 1.95 | 1.16E-37 | 3.31E-36 |

#### Protein secretion/export apparatus

|            |  |                                              |       |      |           |           |
|------------|--|----------------------------------------------|-------|------|-----------|-----------|
| PA14_19680 |  | hypothetical protein                         | 9.87  | 3.30 | 6.99E-10  | 4.01E-09  |
| PA14_19690 |  | hypothetical protein                         | 4.97  | 2.31 | 8.83E-04  | 2.40E-03  |
| PA14_40240 |  | ABC transporter ATP-binding protein/permease | 4.59  | 2.20 | 2.02E-22  | 2.74E-21  |
| PA14_55790 |  | hypothetical protein                         | 16.50 | 4.04 | 4.69E-106 | 7.26E-104 |
| PA14_55800 |  | hypothetical protein                         | 3.86  | 1.95 | 2.25E-21  | 2.93E-20  |
| PA14_55860 |  | hypothetical protein                         | 7.14  | 2.84 | 3.00E-05  | 1.03E-04  |
| PA14_55880 |  | hypothetical protein                         | 14.68 | 3.88 | 1.11E-52  | 5.53E-51  |

#### Type III secretion system

|            |             |                                                          |      |      |          |          |
|------------|-------------|----------------------------------------------------------|------|------|----------|----------|
| PA14_42350 | <i>pscC</i> | Type III secretion outer membrane protein PscC precursor | 4.09 | 2.03 | 4.69E-24 | 7.14E-23 |
|------------|-------------|----------------------------------------------------------|------|------|----------|----------|

|                                                     |              |                                                    |        |      |           |           |
|-----------------------------------------------------|--------------|----------------------------------------------------|--------|------|-----------|-----------|
| PA14_42360                                          | <i>pscB</i>  | type III export apparatus protein                  | 7.15   | 2.84 | 2.71E-26  | 4.56E-25  |
| PA14_42380                                          | <i>exsD</i>  | hypothetical protein                               | 4.20   | 2.07 | 7.78E-14  | 6.30E-13  |
| PA14_42400                                          | <i>exsB</i>  | exoenzyme S synthesis protein B                    | 5.53   | 2.47 | 1.16E-13  | 9.17E-13  |
| PA14_42440                                          | <i>popD</i>  | translocator outer membrane protein PopD precursor | 7.20   | 2.85 | 7.40E-36  | 2.01E-34  |
| PA14_42450                                          | <i>popB</i>  | translocator protein PopB                          | 7.31   | 2.87 | 2.12E-39  | 6.60E-38  |
| PA14_42470                                          | <i>pcrV</i>  | type III secretion protein PcrV                    | 11.31  | 3.50 | 2.19E-37  | 6.20E-36  |
| PA14_42570                                          | <i>pscN</i>  | type III secretion system ATPase                   | 21.64  | 4.44 | 1.56E-48  | 6.75E-47  |
| <b>Type II secretion system</b>                     |              |                                                    |        |      |           |           |
| PA14_55890                                          | <i>cpaF2</i> | type II secretion system protein                   | 10.70  | 3.42 | 3.17E-43  | 1.17E-41  |
| PA14_55900                                          |              | hypothetical protein                               | 8.51   | 3.09 | 2.31E-26  | 3.92E-25  |
| PA14_55920                                          |              | type II secretion system protein                   | 7.98   | 3.00 | 3.96E-50  | 1.81E-48  |
| PA14_55930                                          |              | pilus assembly protein                             | 5.32   | 2.41 | 7.30E-17  | 7.35E-16  |
| PA14_55940                                          |              | hypothetical protein                               | 42.06  | 5.39 | 3.05E-221 | 2.57E-218 |
| <b>Putative enzymes</b>                             |              |                                                    |        |      |           |           |
| PA14_02435                                          |              | hypothetical protein                               | 30.64  | 4.94 | 2.29E-110 | 3.85E-108 |
| PA14_11810                                          |              | aldehyde dehydrogenase                             | 21.05  | 4.40 | 3.98E-84  | 4.69E-82  |
| PA14_30500                                          |              | acyl-CoA dehydrogenase                             | 4.64   | 2.21 | 1.05E-29  | 2.15E-28  |
| PA14_37530                                          |              | hydrolase                                          | 6.27   | 2.65 | 6.98E-51  | 3.31E-49  |
| PA14_40030                                          |              | hypothetical protein                               | 100.91 | 6.66 | 2.60E-226 | 2.55E-223 |
| PA14_51050                                          | <i>pcd</i>   | aldehyde dehydrogenase                             | 5.75   | 2.52 | 1.79E-32  | 4.14E-31  |
| PA14_52900                                          |              | acyl-CoA dehydrogenase                             | 9.81   | 3.29 | 5.24E-36  | 1.44E-34  |
| PA14_54630                                          |              | acyl-CoA dehydrogenase                             | 8.86   | 3.15 | 9.31E-66  | 6.69E-64  |
| PA14_54640                                          |              | enoyl-CoA hydratase                                | 6.88   | 2.78 | 3.91E-52  | 1.90E-50  |
| PA14_54660                                          |              | enoyl-CoA hydratase/isomerase                      | 7.87   | 2.98 | 9.03E-57  | 5.37E-55  |
| PA14_56840                                          |              | hypothetical protein                               | 4.80   | 2.26 | 1.04E-40  | 3.46E-39  |
| <b>Secreted Factors (toxins, enzymes, alginate)</b> |              |                                                    |        |      |           |           |
| PA14_26020                                          |              | aminopeptidase                                     | 4.24   | 2.08 | 3.87E-19  | 4.49E-18  |
| <b>Phenazine biosynthesis</b>                       |              |                                                    |        |      |           |           |
| PA14_09470                                          | <i>phzB1</i> | phenazine biosynthesis protein                     | 6.25   | 2.64 | 1.21E-18  | 1.36E-17  |
| PA14_09480                                          | <i>phzA1</i> | phenazine biosynthesis protein                     | 6.92   | 2.79 | 2.12E-74  | 1.95E-72  |
| PA14_09490                                          | <i>phzM</i>  | phenazine-specific methyltransferase               | 7.15   | 2.84 | 1.57E-79  | 1.68E-77  |
| <b>Type III secretion system</b>                    |              |                                                    |        |      |           |           |
| PA14_00560                                          | <i>exoT</i>  | exoenzyme T                                        | 4.26   | 2.09 | 1.84E-23  | 2.70E-22  |
| PA14_36345                                          | <i>exoY</i>  | adenylate cyclase                                  | 7.12   | 2.83 | 6.08E-45  | 2.37E-43  |
| PA14_42430                                          | <i>exsC</i>  | exoenzyme S synthesis protein C                    | 8.33   | 3.06 | 2.02E-23  | 2.95E-22  |
| PA14_40290                                          | <i>lasA</i>  | LasA protease                                      | 4.94   | 2.31 | 1.63E-50  | 7.48E-49  |
| <b>Transcriptional regulators</b>                   |              |                                                    |        |      |           |           |
| PA14_13150                                          |              | transcriptional regulator                          | 7.12   | 2.83 | 1.13E-71  | 9.55E-70  |
| PA14_25800                                          |              | TetR family transcriptional regulator              | 4.66   | 2.22 | 1.12E-41  | 3.85E-40  |

|                                                                  |             |                                                        |       |      |           |          |
|------------------------------------------------------------------|-------------|--------------------------------------------------------|-------|------|-----------|----------|
| PA14_37990                                                       |             | RNA polymerase sigma factor                            | 4.08  | 2.03 | 5.18E-28  | 9.48E-27 |
| PA14_47580                                                       |             | MarR family transcriptional regulator                  | 7.68  | 2.94 | 1.42E-33  | 3.48E-32 |
| PA14_55160                                                       | <i>toxR</i> | transcriptional regulator ToxR                         | 5.92  | 2.57 | 3.58E-32  | 8.07E-31 |
| PA14_64700                                                       |             | RNA polymerase sigma factor                            | 5.10  | 2.35 | 9.66E-51  | 4.49E-49 |
| PA14_71070                                                       |             | AraC family transcriptional regulator                  | 4.10  | 2.04 | 1.25E-30  | 2.73E-29 |
| <b>ECF sigma factors</b>                                         |             |                                                        |       |      |           |          |
| PA14_01840                                                       |             | RNA polymerase ECF-subfamily sigma-70 factor           | 7.08  | 2.82 | 1.78E-52  | 8.83E-51 |
| PA14_32710                                                       |             | ECF subfamily RNA polymerase sigma-70 factor           | 6.44  | 2.69 | 7.10E-66  | 5.17E-64 |
| PA14_33260                                                       | <i>pvdS</i> | extracytoplasmic-function sigma-70 factor              | 9.30  | 3.22 | 7.58E-62  | 5.01E-60 |
| PA14_39800                                                       |             | ECF subfamily RNA polymerase sigma-70 factor           | 5.85  | 2.55 | 9.69E-51  | 4.49E-49 |
| PA14_46660                                                       |             | RNA polymerase ECF-subfamily sigma-70 factor           | 8.26  | 3.05 | 6.46E-69  | 5.08E-67 |
| PA14_47400                                                       |             | RNA polymerase ECF-subfamily sigma-70 factor           | 4.39  | 2.13 | 1.40E-39  | 4.41E-38 |
| <b>Glycerol metabolism</b>                                       |             |                                                        |       |      |           |          |
| PA14_38930                                                       | <i>glpR</i> | transcriptional regulator                              | 11.51 | 3.53 | 1.60E-100 | 2.35E-98 |
| <b>Quorum sensing</b>                                            |             |                                                        |       |      |           |          |
| PA14_39980                                                       | <i>qscR</i> | transcriptional regulator                              | 9.23  | 3.21 | 1.27E-78  | 1.33E-76 |
| <b>Translation, post-translational modification, degradation</b> |             |                                                        |       |      |           |          |
| PA14_13840                                                       |             | peptidyl-prolyl cis-trans isomerase, PpiC-type         | 4.42  | 2.14 | 9.55E-34  | 2.36E-32 |
| PA14_57580                                                       | <i>rpsI</i> | 30S ribosomal protein S9                               | 4.65  | 2.22 | 1.01E-25  | 1.67E-24 |
| PA14_57590                                                       | <i>rplM</i> | 50S ribosomal protein L13                              | 4.36  | 2.12 | 2.40E-45  | 9.61E-44 |
| PA14_60400                                                       | <i>rpsT</i> | 30S ribosomal protein S20                              | 5.16  | 2.37 | 5.28E-28  | 9.60E-27 |
| <b>Transport of small molecules</b>                              |             |                                                        |       |      |           |          |
| PA14_01860                                                       |             | transmembrane sensor                                   | 6.10  | 2.61 | 1.15E-19  | 1.37E-18 |
| PA14_02640                                                       | <i>mcdM</i> | malonate transporter subunit MadM                      | 4.57  | 2.19 | 4.16E-13  | 3.19E-12 |
| PA14_02690                                                       |             | amino acid permease                                    | 5.39  | 2.43 | 5.87E-15  | 5.15E-14 |
| PA14_02700                                                       |             | aminotransferase                                       | 26.02 | 4.70 | 2.85E-35  | 7.42E-34 |
| PA14_02720                                                       |             | hypothetical protein                                   | 40.01 | 5.32 | 2.56E-44  | 9.87E-43 |
| PA14_16410                                                       |             | MFS transporter                                        | 11.10 | 3.47 | 1.05E-81  | 1.17E-79 |
| PA14_18680                                                       | <i>bfd</i>  | hypothetical protein                                   | 3.89  | 1.96 | 2.89E-07  | 1.26E-06 |
| PA14_30590                                                       |             | outer membrane receptor protein                        | 4.51  | 2.17 | 6.80E-19  | 7.76E-18 |
| PA14_30600                                                       |             | permease                                               | 9.36  | 3.23 | 1.69E-46  | 6.96E-45 |
| PA14_34770                                                       |             | ABC transporter substrate-binding protein              | 8.23  | 3.04 | 3.70E-11  | 2.37E-10 |
| PA14_34780                                                       |             | ABC transporter ATP-binding protein                    | 5.27  | 2.40 | 6.47E-24  | 9.79E-23 |
| PA14_34790                                                       |             | ABC transporter permease                               | 5.17  | 2.37 | 3.46E-14  | 2.85E-13 |
| PA14_38220                                                       |             | hypothetical protein                                   | 4.47  | 2.16 | 4.86E-43  | 1.78E-41 |
| PA14_38320                                                       | <i>yfeH</i> | bile acid/Na <sup>+</sup> symporter family transporter | 8.67  | 3.12 | 5.06E-77  | 5.05E-75 |

|                                            |              |                                                                                  |       |      |           |           |
|--------------------------------------------|--------------|----------------------------------------------------------------------------------|-------|------|-----------|-----------|
| PA14_38580                                 |              | hypothetical protein                                                             | 6.07  | 2.60 | 2.37E-23  | 3.43E-22  |
| PA14_45240                                 |              | amino acid permease                                                              | 4.15  | 2.05 | 9.01E-16  | 8.43E-15  |
| PA14_46910                                 | <i>ybeJ</i>  | ABC transporter substrate-binding protein                                        | 4.26  | 2.09 | 5.96E-40  | 1.90E-38  |
| PA14_51880                                 | <i>oprD</i>  | basic amino acid, basic peptide and imipenem outer membrane porin OprD precursor | 5.27  | 2.40 | 2.47E-56  | 1.43E-54  |
| PA14_53050                                 | <i>aroP2</i> | aromatic amino acid transport protein AroP2                                      | 6.87  | 2.78 | 3.05E-69  | 2.42E-67  |
| PA14_57990                                 |              | hypothetical protein                                                             | 5.29  | 2.40 | 3.89E-20  | 4.75E-19  |
| PA14_64320                                 |              | hypothetical protein                                                             | 4.73  | 2.24 | 1.64E-22  | 2.25E-21  |
| PA14_67840                                 |              | ABC-type amino acid transporter                                                  | 4.30  | 2.10 | 1.78E-20  | 2.21E-19  |
| PA14_67860                                 |              | ABC-type amino acid transporter                                                  | 5.01  | 2.32 | 4.73E-23  | 6.75E-22  |
| PA14_68070                                 |              | periplasmic binding protein                                                      | 5.18  | 2.37 | 1.80E-07  | 8.05E-07  |
| PA14_72340                                 | <i>gltP</i>  | glutamate/aspartate:proton symporter                                             | 5.32  | 2.41 | 5.06E-23  | 7.19E-22  |
| PA14_72710                                 |              | transporter                                                                      | 3.91  | 1.97 | 1.08E-23  | 1.60E-22  |
| PA14_73110                                 |              | hypothetical protein                                                             | 9.70  | 3.28 | 3.51E-16  | 3.34E-15  |
| PA14_73120                                 |              | hypothetical protein                                                             | 4.55  | 2.19 | 3.82E-43  | 1.41E-41  |
| <b>Branched-chain amino acid transport</b> |              |                                                                                  |       |      |           |           |
| PA14_50540                                 | <i>livM</i>  | leucine/isoleucine/valine transporter permease subunit                           | 4.32  | 2.11 | 1.02E-27  | 1.83E-26  |
| PA14_50550                                 | <i>livG</i>  | leucine/isoleucine/valine transporter ATP-binding subunit                        | 4.75  | 2.25 | 1.09E-29  | 2.22E-28  |
| PA14_64860                                 | <i>livF</i>  | ABC transporter ATP-binding protein                                              | 13.13 | 3.71 | 3.40E-19  | 3.95E-18  |
| PA14_64870                                 | <i>braF</i>  | ABC transporter ATP-binding protein                                              | 12.53 | 3.65 | 6.23E-43  | 2.25E-41  |
| PA14_64880                                 | <i>braE</i>  | branched chain amino acid ABC transporter permease                               | 17.08 | 4.09 | 2.14E-48  | 9.21E-47  |
| PA14_64890                                 | <i>braD</i>  | branched chain amino acid ABC transporter permease                               | 6.71  | 2.75 | 1.18E-25  | 1.95E-24  |
| <b>C4-dicarboxylate transport</b>          |              |                                                                                  |       |      |           |           |
| PA14_52820                                 | <i>dctQ</i>  | C4-dicarboxylate transporter                                                     | 27.85 | 4.80 | 3.01E-27  | 5.31E-26  |
| PA14_52840                                 | <i>dctP</i>  | C4-dicarboxylate-binding periplasmic protein                                     | 15.64 | 3.97 | 1.45E-75  | 1.40E-73  |
| <b>Iron uptake</b>                         |              |                                                                                  |       |      |           |           |
| PA14_02410                                 |              | TonB-dependent receptor                                                          | 36.54 | 5.19 | 2.79E-93  | 3.82E-91  |
| PA14_02490                                 | <i>tonB2</i> | hypothetical protein                                                             | 15.54 | 3.96 | 3.57E-122 | 7.02E-120 |
| PA14_02500                                 | <i>exbB1</i> | transport protein ExbB                                                           | 21.18 | 4.40 | 2.75E-153 | 8.11E-151 |
| PA14_02510                                 | <i>exbD1</i> | transport protein ExbD                                                           | 26.20 | 4.71 | 1.09E-174 | 4.57E-172 |
| PA14_09970                                 | <i>fpvB</i>  | type I ferripyoverdine receptor, FpvB                                            | 9.98  | 3.32 | 1.80E-87  | 2.26E-85  |
| PA14_33680                                 | <i>fpvA</i>  | ferripyoverdine receptor                                                         | 10.23 | 3.35 | 2.37E-106 | 3.78E-104 |
| PA14_37980                                 |              | Fe <sup>2+</sup> -dicitrate sensor, membrane protein                             | 4.60  | 2.20 | 2.72E-12  | 1.96E-11  |
| PA14_39820                                 | <i>ufrA</i>  | tonB-dependent receptor protein                                                  | 5.75  | 2.52 | 1.34E-30  | 2.90E-29  |
| PA14_45340                                 |              | heme exporter protein                                                            | 5.47  | 2.45 | 2.67E-30  | 5.74E-29  |

|                                         |             |                                                    |       |      |           |           |
|-----------------------------------------|-------------|----------------------------------------------------|-------|------|-----------|-----------|
| PA14_47380                              | <i>hxC</i>  | heme utilization protein                           | 4.40  | 2.14 | 4.31E-39  | 1.32E-37  |
| PA14_68900                              | <i>fbpA</i> | iron ABC transporter substrate-binding protein     | 4.38  | 2.13 | 7.12E-20  | 8.63E-19  |
| PA14_72640                              |             | TonB-dependent receptor                            | 4.29  | 2.10 | 5.84E-40  | 1.87E-38  |
| <b>Pyochelin biosynthesis</b>           |             |                                                    |       |      |           |           |
| PA14_09270                              | <i>pchE</i> | dihydroaeruginic acid synthetase                   | 4.03  | 2.01 | 2.98E-12  | 2.14E-11  |
| PA14_09280                              | <i>pchF</i> | pyochelin synthetase                               | 4.00  | 2.00 | 5.59E-17  | 5.68E-16  |
| <b>Sulfonate transport</b>              |             |                                                    |       |      |           |           |
| PA14_02330                              | <i>atsC</i> | ABC transporter ATP-binding protein                | 29.85 | 4.90 | 4.46E-90  | 5.84E-88  |
| PA14_02340                              | <i>atsB</i> | ABC transporter permease                           | 25.73 | 4.69 | 7.96E-151 | 2.04E-148 |
| PA14_02360                              | <i>atsR</i> | ABC transporter substrate-binding protein          | 14.31 | 3.84 | 1.58E-38  | 4.76E-37  |
| PA14_12940                              |             | taurine ABC transporter ATP-binding protein        | 5.87  | 2.55 | 6.51E-29  | 1.28E-27  |
| PA14_19510                              | <i>ssuC</i> | ABC transporter permease                           | 4.67  | 2.22 | 3.26E-06  | 1.26E-05  |
| PA14_19580                              | <i>ssuB</i> | aliphatic sulfonates transport ATP-binding subunit | 7.35  | 2.88 | 4.94E-54  | 2.67E-52  |
| <b>Two-component regulatory systems</b> |             |                                                    |       |      |           |           |
| PA14_06170                              | <i>fiuR</i> | transmembrane sensor                               | 6.41  | 2.68 | 2.60E-59  | 1.60E-57  |
| PA14_38740                              |             | two-component sensor                               | 12.02 | 3.59 | 6.92E-107 | 1.13E-104 |
| PA14_47390                              |             | transmembrane sensor                               | 6.50  | 2.70 | 1.29E-65  | 9.15E-64  |
| PA14_52250                              | <i>pirR</i> | two-component response regulator                   | 3.91  | 1.97 | 6.14E-35  | 1.59E-33  |
| PA14_57140                              |             | two-component response regulator                   | 4.13  | 2.05 | 2.30E-20  | 2.84E-19  |
| <b>Chemotaxis and motility</b>          |             |                                                    |       |      |           |           |
| PA14_02250                              | <i>cheA</i> | two-component sensor                               | 11.17 | 3.48 | 2.18E-94  | 3.14E-92  |
| PA14_05330                              | <i>pilH</i> | twitching motility protein PilH                    | 6.13  | 2.62 | 7.45E-55  | 4.14E-53  |
| <b>Ethanol catabolism</b>               |             |                                                    |       |      |           |           |
| PA14_38900                              | <i>exaE</i> | two-component response regulator                   | 42.47 | 5.41 | 4.03E-157 | 1.32E-154 |
| PA14_38910                              | <i>exaD</i> | sensor kinase                                      | 27.54 | 4.78 | 1.08E-91  | 1.45E-89  |
| PA14_38970                              |             | two-component sensor                               | 39.20 | 5.29 | 9.24E-61  | 5.91E-59  |
| <b>C4-dicarboxylate transport</b>       |             |                                                    |       |      |           |           |
| PA14_55780                              |             | two-component sensor                               | 17.99 | 4.17 | 5.12E-48  | 2.17E-46  |

175 <sup>a</sup> If part of an affected pathway or operon, genes differently expressed at least 1.5-fold were also considered.

176 <sup>b,c,d</sup> Functional categorization, gene ID and gene/product names are taken from the Pseudomonas Genome database<sup>52</sup> and  
177 KEGG (Kyoto Encyclopedia of Genes and Genome)<sup>53</sup>.

178

179



180 b Transcripts with decreased abundance in B-96 cultures of PA14 $\Delta$ *hfq* when compared with  
 181 PA14. A fold change cut-off of -4 and a p-value above 0.05 were applied. The colour coding  
 182 of different functional classes corresponds to those shown in Fig. 2b.

| PA14_id <sup>b</sup>                                             | Gene <sup>c</sup> | Description <sup>d</sup>                                               | Fold Change | log2Fold Change | pval      | padj      |
|------------------------------------------------------------------|-------------------|------------------------------------------------------------------------|-------------|-----------------|-----------|-----------|
| <b>Adaptation, Protection</b>                                    |                   |                                                                        |             |                 |           |           |
| PA14_21760                                                       | <i>capB</i>       | cold acclimation protein B                                             | -4.63       | -2.21           | 4.69E-53  | 2.40E-51  |
| PA14_27520                                                       | <i>gpo</i>        | glutathione peroxidase                                                 | -4.53       | -2.18           | 2.19E-38  | 6.59E-37  |
| PA14_00710                                                       | <i>osmC</i>       | osmotically inducible protein OsmC                                     | -3.31       | -1.72           | 2.62E-06  | 1.02E-05  |
| PA14_64480                                                       | <i>osmE</i>       | DNA-binding transcriptional activator OsmE                             | -2.34       | -1.23           | 2.34E-08  | 1.14E-07  |
| <b>Amino acid biosynthesis and metabolism</b>                    |                   |                                                                        |             |                 |           |           |
| PA14_02730                                                       |                   | dihydrodipicolinate synthetase                                         | -36.75      | -5.20           | 2.23E-75  | 2.12E-73  |
| PA14_14020                                                       |                   | hypothetical protein                                                   | -8.35       | -3.06           | 7.39E-42  | 2.57E-40  |
| PA14_39590                                                       | <i>metE</i>       | 5-methyltetrahydropteroyltriglutamate/homocysteine S-methyltransferase | -19.39      | -4.28           | 7.81E-164 | 2.88E-161 |
| <b>Histidine degradation</b>                                     |                   |                                                                        |             |                 |           |           |
| PA14_67320                                                       | <i>hutH</i>       | histidine ammonia-lyase                                                | -5.71       | -2.51           | 8.93E-39  | 2.71E-37  |
| PA14_67350                                                       | <i>hutU</i>       | urocanate hydratase                                                    | -4.43       | -2.15           | 8.95E-33  | 2.10E-31  |
| <b>Anthranilate biosynthesis</b>                                 |                   |                                                                        |             |                 |           |           |
| PA14_51350                                                       | <i>phnB</i>       | anthranilate synthase component II                                     | -5.38       | -2.43           | 4.48E-45  | 1.76E-43  |
| PA14_51360                                                       | <i>phnA</i>       | anthranilate synthase component I                                      | -3.92       | -1.97           | 8.87E-27  | 1.53E-25  |
| <b>Biosynthesis of cofactors, prosthetic groups and carriers</b> |                   |                                                                        |             |                 |           |           |
| PA14_01430                                                       |                   | short chain dehydrogenase                                              | -6.31       | -2.66           | 4.78E-04  | 1.35E-03  |
| PA14_06890                                                       |                   | hypothetical protein                                                   | -5.03       | -2.33           | 9.86E-36  | 2.62E-34  |
| PA14_39640                                                       | <i>cobN</i>       | cobaltochelata subunit CobN                                            | -13.18      | -3.72           | 3.12E-06  | 1.20E-05  |
| PA14_72980                                                       |                   | G3E family GTPase                                                      | -6.87       | -2.78           | 1.67E-05  | 5.92E-05  |
| PA14_73010                                                       |                   | hypothetical protein                                                   | -14.75      | -3.88           | 1.59E-09  | 8.75E-09  |
| <b>Carbon compound catabolism</b>                                |                   |                                                                        |             |                 |           |           |
| PA14_14300                                                       |                   | zinc-binding oxidoreductase                                            | -6.30       | -2.66           | 1.35E-04  | 4.23E-04  |
| PA14_26130                                                       | <i>morB</i>       | morphinone reductase                                                   | -4.74       | -2.24           | 2.46E-42  | 8.61E-41  |
| PA14_37770                                                       |                   | hydrolase                                                              | -7.66       | -2.94           | 8.92E-61  | 5.78E-59  |
| PA14_54000                                                       | <i>prpD</i>       | 2-methylcitrate dehydratase                                            | -4.42       | -2.14           | 6.58E-11  | 4.14E-10  |
| <b>Cell wall / LPS / capsule</b>                                 |                   |                                                                        |             |                 |           |           |
| PA14_73040                                                       | <i>amiA</i>       | N-acetylmuramoyl-L-alanine amidase                                     | -11.86      | -3.57           | 9.89E-78  | 1.02E-75  |
| PA14_61650                                                       | <i>pagL</i>       | Lipid A 3-O-deacylase                                                  | -3.10       | -1.63           | 7.98E-22  | 1.06E-20  |
| PA14_17220                                                       | <i>lpxB</i>       | lipid-A-disaccharide synthase                                          | -2.58       | -1.37           | 9.88E-16  | 9.19E-15  |
| PA14_20890                                                       | <i>rfaD</i>       | ADP-L-glycero-D-manno-heptose-6-epimerase                              | -2.31       | -1.21           | 1.32E-09  | 7.36E-09  |
| PA14_23380                                                       | <i>orfH</i>       | UDP-N-acetyl-D-mannosaminuronate dehydrogenase                         | -1.68       | -0.75           | 7.95E-05  | 2.56E-04  |

|                                                                |             |                                                                                                              |        |       |           |           |
|----------------------------------------------------------------|-------------|--------------------------------------------------------------------------------------------------------------|--------|-------|-----------|-----------|
| PA14_23420                                                     |             | zinc-binding dehydrogenase involved in O antigen biosynthesis                                                | -2.72  | -1.44 | 1.53E-02  | 3.21E-02  |
| PA14_23430                                                     |             | heparinase                                                                                                   | -2.47  | -1.31 | 4.04E-02  | 7.57E-02  |
| PA14_23450                                                     | <i>orfM</i> | NAD dependent epimerase/dehydratase                                                                          | -1.68  | -0.75 | 3.05E-02  | 5.95E-02  |
| PA14_53500                                                     |             | predicted outer membrane protein and related peptidoglycan-associated (lipo)proteins                         | -2.14  | -1.10 | 7.80E-11  | 4.88E-10  |
| PA14_57370                                                     | <i>murD</i> | UDP-N-acetylmuramoyl-L-alanyl-D-glutamate synthetase                                                         | -2.53  | -1.34 | 6.91E-12  | 4.79E-11  |
| PA14_57390                                                     | <i>murF</i> | UDP-N-acetylmuramoylalanyl-D-glutamyl-2,6-diaminopimelate--D-alanyl-D-alanine ligase                         | -2.40  | -1.27 | 1.15E-10  | 7.10E-10  |
| PA14_57425                                                     | <i>ftsI</i> | penicillin-binding protein 3                                                                                 | -2.12  | -1.08 | 1.31E-10  | 8.01E-10  |
| PA14_57450                                                     | <i>mraW</i> | S-adenosyl-methyltransferase MraW                                                                            | -2.21  | -1.14 | 3.09E-10  | 1.84E-09  |
| PA14_62840                                                     | <i>glmM</i> | phosphoglucosamine mutase                                                                                    | -2.04  | -1.03 | 1.25E-11  | 8.44E-11  |
| PA14_68170                                                     | <i>rmlB</i> | dTDP-D-glucose 4,6-dehydratase                                                                               | -3.38  | -1.76 | 3.53E-10  | 2.09E-09  |
| PA14_68210                                                     | <i>rmlC</i> | dTDP-4-dehydrorhamnose 3,5-epimerase                                                                         | -2.61  | -1.39 | 4.23E-18  | 4.56E-17  |
| PA14_23460                                                     | <i>orfN</i> | group 4 glycosyl transferase                                                                                 | -1.78  | -0.83 | 1.59E-02  | 3.34E-02  |
| <b>Central intermediary metabolism</b>                         |             |                                                                                                              |        |       |           |           |
| PA14_45000                                                     | <i>gcl</i>  | glyoxylate carboligase                                                                                       | -17.13 | -4.10 | 1.34E-122 | 2.73E-120 |
| PA14_45010                                                     | <i>hyi</i>  | hydroxypyruvate isomerase                                                                                    | -7.79  | -2.96 | 6.89E-24  | 1.04E-22  |
| <b>Chaperones &amp; heat shock proteins</b>                    |             |                                                                                                              |        |       |           |           |
| PA14_23680                                                     | <i>ibpA</i> | heat-shock protein IbpA                                                                                      | -4.25  | -2.09 | 4.04E-25  | 6.44E-24  |
| PA14_42980                                                     |             | ClpA/B-type protease                                                                                         | -9.94  | -3.31 | 4.27E-39  | 1.32E-37  |
| PA14_62960                                                     | <i>dnaJ</i> | chaperone protein DnaJ                                                                                       | -3.97  | -1.99 | 1.45E-09  | 7.98E-09  |
| PA14_62970                                                     | <i>dnaK</i> | molecular chaperone DnaK                                                                                     | -4.63  | -2.21 | 1.31E-48  | 5.73E-47  |
| PA14_62990                                                     | <i>grpE</i> | heat shock protein GrpE                                                                                      | -4.05  | -2.02 | 3.73E-21  | 4.80E-20  |
| PA14_60190                                                     | <i>clpB</i> | clpB protein; ATP-binding subunits of Clp protease and DnaK/DnaJ chaperones                                  | -2.82  | -1.49 | 2.85E-22  | 3.86E-21  |
| PA14_54210                                                     | <i>asrA</i> | ATP-dependent protease; aminoglycoside-induced stress response ATP-dependent protease AsrA; protein turnover | -2.48  | -1.31 | 4.20E-08  | 2.00E-07  |
| <b>Chemotaxis</b>                                              |             |                                                                                                              |        |       |           |           |
| PA14_46030                                                     |             | chemotaxis transducer                                                                                        | -4.97  | -2.31 | 1.41E-27  | 2.52E-26  |
| <b>DNA replication, recombination, modification and repair</b> |             |                                                                                                              |        |       |           |           |
| PA14_30160                                                     | <i>mutT</i> | hypothetical protein                                                                                         | -8.07  | -3.01 | 1.00E-29  | 2.07E-28  |
| <b>Energy metabolism</b>                                       |             |                                                                                                              |        |       |           |           |
| PA14_05820                                                     |             | hypothetical protein                                                                                         | -5.85  | -2.55 | 4.04E-11  | 2.58E-10  |
| PA14_06960                                                     |             | hypothetical protein                                                                                         | -11.83 | -3.56 | 1.86E-93  | 2.60E-91  |
| PA14_63100                                                     |             | ferredoxin                                                                                                   | -8.19  | -3.03 | 2.80E-74  | 2.54E-72  |
| <b>Glycerol metabolism</b>                                     |             |                                                                                                              |        |       |           |           |
| PA14_17930                                                     | <i>glpD</i> | glycerol-3-phosphate dehydrogenase                                                                           | -4.84  | -2.27 | 1.22E-25  | 2.00E-24  |

**TCA cycle**

|            |            |                                    |       |       |          |          |
|------------|------------|------------------------------------|-------|-------|----------|----------|
| PA14_30180 | <i>idh</i> | monomeric isocitrate dehydrogenase | -5.22 | -2.38 | 3.51E-28 | 6.50E-27 |
|------------|------------|------------------------------------|-------|-------|----------|----------|

**Lactate oxidation**

|            |             |                         |        |       |          |          |
|------------|-------------|-------------------------|--------|-------|----------|----------|
| PA14_33860 | <i>lldA</i> | L-lactate dehydrogenase | -6.22  | -2.64 | 6.10E-29 | 1.20E-27 |
| PA14_63090 | <i>lldD</i> | L-lactate dehydrogenase | -10.39 | -3.38 | 9.63E-70 | 7.88E-68 |

**Denitrification (*nuo* operon; NADH dehydrogenase)**

|            |             |                                                                     |       |       |          |          |
|------------|-------------|---------------------------------------------------------------------|-------|-------|----------|----------|
| PA14_30020 | <i>nuoA</i> | NADH dehydrogenase subunit A                                        | -4.48 | -2.16 | 2.27E-35 | 5.93E-34 |
| PA14_29900 | <i>nuoJ</i> | NADH dehydrogenase subunit J; NADH-quinone oxidoreductase subunit J | -2.38 | -1.25 | 2.85E-06 | 1.11E-05 |
| PA14_29920 | <i>nuoI</i> | NADH dehydrogenase subunit I; NADH-quinone oxidoreductase subunit I | -2.41 | -1.27 | 1.62E-08 | 7.99E-08 |
| PA14_29930 | <i>nuoH</i> | NADH dehydrogenase subunit H; NADH-quinone oxidoreductase subunit H | -2.43 | -1.28 | 4.29E-13 | 3.28E-12 |
| PA14_29970 | <i>nuoF</i> | NADH dehydrogenase subunit F; NADH-quinone oxidoreductase subunit F | -3.20 | -1.68 | 3.42E-26 | 5.72E-25 |
| PA14_29940 | <i>nuoG</i> | NADH dehydrogenase subunit G; NADH-quinone oxidoreductase subunit G | -2.20 | -1.14 | 5.40E-14 | 4.41E-13 |
| PA14_29980 | <i>nuoE</i> | NADH dehydrogenase subunit E; NADH-quinone oxidoreductase subunit E | -2.91 | -1.54 | 2.11E-20 | 2.61E-19 |
| PA14_29990 | <i>nuoD</i> | bifunctional NADH:ubiquinone oxidoreductase subunit C/D             | -3.33 | -1.74 | 8.43E-30 | 1.76E-28 |
| PA14_30010 | <i>nuoB</i> | NADH dehydrogenase subunit B; NADH-quinone oxidoreductase subunit B | -2.80 | -1.49 | 8.45E-23 | 1.18E-21 |

**Fatty acid and phospholipid metabolism**

|            |               |                            |        |       |          |          |
|------------|---------------|----------------------------|--------|-------|----------|----------|
| PA14_05840 | <i>gcdH</i>   | glutaryl-CoA dehydrogenase | -10.89 | -3.45 | 1.47E-09 | 8.08E-09 |
| PA14_11280 |               | hypothetical protein       | -13.31 | -3.73 | 3.09E-20 | 3.78E-19 |
| PA14_16640 |               | lipoprotein                | -6.08  | -2.60 | 3.20E-18 | 3.48E-17 |
| PA14_40800 |               | hypothetical protein       | -6.22  | -2.64 | 7.65E-34 | 1.90E-32 |
| PA14_71890 | <i>psecoA</i> | coenzyme A transferase     | -9.01  | -3.17 | 3.71E-66 | 2.73E-64 |

**Hypothetical, unclassified, unknown**

|            |  |                      |        |       |           |           |
|------------|--|----------------------|--------|-------|-----------|-----------|
| PA14_06040 |  | hypothetical protein | -4.21  | -2.07 | 3.49E-24  | 5.35E-23  |
| PA14_10360 |  | hypothetical protein | -5.39  | -2.43 | 4.15E-45  | 1.64E-43  |
| PA14_11320 |  | hypothetical protein | -15.46 | -3.95 | 3.89E-18  | 4.20E-17  |
| PA14_12530 |  | hypothetical protein | -5.58  | -2.48 | 9.57E-44  | 3.57E-42  |
| PA14_15710 |  | hypothetical protein | -4.32  | -2.11 | 4.42E-33  | 1.05E-31  |
| PA14_16990 |  | hypothetical protein | -12.86 | -3.68 | 3.12E-119 | 5.74E-117 |
| PA14_18960 |  | hypothetical protein | -5.05  | -2.33 | 6.74E-24  | 1.02E-22  |
| PA14_28360 |  | hypothetical protein | -6.60  | -2.72 | 3.59E-56  | 2.05E-54  |
| PA14_31420 |  | hypothetical protein | -5.27  | -2.40 | 1.06E-47  | 4.47E-46  |
| PA14_32780 |  | hypothetical protein | -6.98  | -2.80 | 9.80E-29  | 1.89E-27  |
| PA14_37780 |  | hypothetical protein | -11.28 | -3.50 | 6.86E-85  | 8.42E-83  |
| PA14_38270 |  | hypothetical protein | -4.37  | -2.13 | 2.83E-30  | 6.03E-29  |
| PA14_39660 |  | hypothetical protein | -8.30  | -3.05 | 5.44E-25  | 8.61E-24  |
| PA14_43050 |  | hypothetical protein | -5.98  | -2.58 | 1.64E-64  | 1.12E-62  |
| PA14_44990 |  | hypothetical protein | -6.82  | -2.77 | 3.85E-41  | 1.30E-39  |

|                                               |             |                                                 |        |       |          |          |
|-----------------------------------------------|-------------|-------------------------------------------------|--------|-------|----------|----------|
| PA14_47130                                    |             | hypothetical protein                            | -5.50  | -2.46 | 2.31E-26 | 3.92E-25 |
| PA14_53980                                    |             | hypothetical protein                            | -5.63  | -2.49 | 1.97E-40 | 6.44E-39 |
| PA14_54180                                    |             | hypothetical protein                            | -26.04 | -4.70 | 3.68E-28 | 6.78E-27 |
| PA14_56170                                    |             | hypothetical protein                            | -7.94  | -2.99 | 9.94E-13 | 7.36E-12 |
| PA14_58230                                    |             | hypothetical protein                            | -6.66  | -2.74 | 3.43E-14 | 2.83E-13 |
| PA14_58240                                    |             | hypothetical protein                            | -4.82  | -2.27 | 5.47E-23 | 7.71E-22 |
| PA14_60540                                    |             | hypothetical protein                            | -3.92  | -1.97 | 4.12E-10 | 2.43E-09 |
| PA14_60650                                    |             | hypothetical protein                            | -5.03  | -2.33 | 3.37E-31 | 7.45E-30 |
| PA14_63920                                    |             | hypothetical protein                            | -48.89 | -5.61 | 1.25E-20 | 1.56E-19 |
| PA14_63940                                    |             | hypothetical protein                            | -61.79 | -5.95 | 1.08E-13 | 8.59E-13 |
| PA14_68840                                    |             | hypothetical protein                            | -5.61  | -2.49 | 5.61E-38 | 1.65E-36 |
| PA14_73000                                    |             | hypothetical protein                            | -19.64 | -4.30 | 3.26E-14 | 2.69E-13 |
| PA14_73050                                    |             | GTP cyclohydrolase                              | -12.25 | -3.62 | 1.01E-28 | 1.94E-27 |
| <b>Membrane proteins</b>                      |             |                                                 |        |       |          |          |
| PA14_00510                                    |             | hemagglutinin                                   | -4.69  | -2.23 | 2.12E-40 | 6.87E-39 |
| PA14_11290                                    |             | permease                                        | -11.02 | -3.46 | 3.04E-34 | 7.65E-33 |
| PA14_16630                                    |             | outer membrane protein, OmpA                    | -5.22  | -2.38 | 3.61E-29 | 7.21E-28 |
| PA14_18720                                    | <i>motY</i> | OmpA family membrane protein                    | -4.15  | -2.05 | 1.59E-23 | 2.35E-22 |
| PA14_26420                                    |             | TonB-dependent receptor                         | -4.02  | -2.01 | 3.87E-05 | 1.31E-04 |
| PA14_54520                                    | <i>opdH</i> | porin                                           | -3.90  | -1.96 | 1.13E-14 | 9.69E-14 |
| PA14_60630                                    |             | hypothetical protein                            | -5.29  | -2.40 | 5.29E-35 | 1.37E-33 |
| PA14_63910                                    |             | hypothetical protein                            | -43.91 | -5.46 | 3.51E-24 | 5.38E-23 |
| PA14_63960                                    |             | uter membrane protein                           | -31.62 | -4.98 | 5.17E-23 | 7.31E-22 |
| PA14_63970                                    |             | hypothetical protein                            | -13.76 | -3.78 | 2.20E-13 | 1.72E-12 |
| <b>Nucleotide biosynthesis and metabolism</b> |             |                                                 |        |       |          |          |
| PA14_73070                                    | <i>pyrQ</i> | dihydroorotase                                  | -16.06 | -4.01 | 2.60E-17 | 2.70E-16 |
| <b>Protein secretion/export apparatus</b>     |             |                                                 |        |       |          |          |
| PA14_10340                                    | <i>cvaB</i> | toxin transporter                               | -4.21  | -2.07 | 3.61E-12 | 2.58E-11 |
| PA14_10350                                    |             | secretion protein                               | -6.81  | -2.77 | 1.97E-18 | 2.17E-17 |
| <b>Type VI secretion system</b>               |             |                                                 |        |       |          |          |
| PA14_42950                                    |             | predicted type VI secretion system protein ImpI | -8.75  | -3.13 | 2.32E-10 | 1.39E-09 |
| PA14_42990                                    |             | predicted type VI secretion system protein ImpH | -6.28  | -2.65 | 2.70E-41 | 9.19E-40 |
| PA14_43000                                    |             | predicted type VI secretion system protein ImpG | -10.94 | -3.45 | 2.67E-66 | 1.99E-64 |
| PA14_43020                                    |             | predicted type VI secretion system protein      | -6.97  | -2.80 | 2.64E-15 | 2.37E-14 |
| PA14_43030                                    |             | predicted type VI secretion system protein ImpC | -7.29  | -2.87 | 5.20E-30 | 1.10E-28 |
| PA14_43040                                    |             | predicted type VI secretion system protein ImpB | -5.47  | -2.45 | 5.36E-43 | 1.95E-41 |
| <b>Putative enzymes</b>                       |             |                                                 |        |       |          |          |
| PA14_09580                                    |             | hypothetical protein                            | -6.36  | -2.67 | 7.19E-44 | 2.73E-42 |
| PA14_09950                                    |             | oxidoreductase                                  | -8.62  | -3.11 | 8.50E-67 | 6.50E-65 |
| PA14_17730                                    |             | hypothetical protein                            | -8.02  | -3.00 | 5.43E-37 | 1.51E-35 |
| PA14_37745                                    |             | carbamoyl transferase                           | -5.28  | -2.40 | 8.02E-53 | 4.04E-51 |
| PA14_45020                                    | <i>glxR</i> | oxidoreductase                                  | -5.32  | -2.41 | 1.05E-08 | 5.26E-08 |
| PA14_46620                                    |             | pyridine nucleotide-disulfide oxidoreductase    | -4.55  | -2.19 | 4.71E-44 | 1.80E-42 |

|                                                                  |              |                                                                                        |        |       |           |           |
|------------------------------------------------------------------|--------------|----------------------------------------------------------------------------------------|--------|-------|-----------|-----------|
| PA14_49800                                                       | <i>gsp69</i> | oxidoreductase                                                                         | -5.14  | -2.36 | 3.25E-27  | 5.71E-26  |
| PA14_56160                                                       | <i>moxR</i>  | hypothetical protein                                                                   | -4.09  | -2.03 | 4.52E-23  | 6.46E-22  |
| <b>Secreted Factors (toxins, enzymes, alginate)</b>              |              |                                                                                        |        |       |           |           |
| <b>Rhamnolipids biosynthesis</b>                                 |              |                                                                                        |        |       |           |           |
| PA14_19100                                                       | <i>rhlA</i>  | rhamnosyltransferase chain A                                                           | -4.97  | -2.31 | 1.03E-53  | 5.48E-52  |
| PA14_19110                                                       | <i>rhlB</i>  | rhamnosyltransferase chain B                                                           | -3.60  | -1.85 | 3.67E-11  | 2.36E-10  |
| <b>Transcription, RNA processing and degradation</b>             |              |                                                                                        |        |       |           |           |
| PA14_08760                                                       | <i>rpoB</i>  | DNA-directed RNA polymerase subunit beta                                               | -4.12  | -2.04 | 6.61E-46  | 2.67E-44  |
| PA14_08780                                                       | <i>rpoC</i>  | DNA-directed RNA polymerase subunit beta'                                              | -9.68  | -3.28 | 3.83E-12  | 2.73E-11  |
| <b>Transcriptional regulators</b>                                |              |                                                                                        |        |       |           |           |
| PA14_00460                                                       | <i>trpI</i>  | transcriptional regulator TrpI                                                         | -4.76  | -2.25 | 8.13E-17  | 8.17E-16  |
| PA14_01640                                                       |              | LysR family transcriptional regulator                                                  | -4.67  | -2.22 | 1.69E-22  | 2.32E-21  |
| PA14_06970                                                       |              | Cro/CI family transcriptional regulator                                                | -4.84  | -2.27 | 1.25E-29  | 2.55E-28  |
| PA14_09570                                                       |              | LysR family transcriptional regulator                                                  | -4.98  | -2.32 | 7.26E-32  | 1.63E-30  |
| PA14_23730                                                       |              | LysR family transcriptional regulator                                                  | -6.60  | -2.72 | 5.01E-30  | 1.07E-28  |
| PA14_34880                                                       |              | GntR family transcriptional regulator                                                  | -5.54  | -2.47 | 1.89E-49  | 8.42E-48  |
| PA14_38680                                                       |              | LysR family transcriptional regulator                                                  | -6.15  | -2.62 | 8.94E-36  | 2.39E-34  |
| PA14_42970                                                       |              | transcriptional regulator                                                              | -10.50 | -3.39 | 2.19E-12  | 1.59E-11  |
| PA14_46480                                                       |              | transcriptional regulator                                                              | -6.06  | -2.60 | 1.49E-35  | 3.92E-34  |
| PA14_47520                                                       |              | transcriptional regulator                                                              | -6.12  | -2.61 | 1.56E-40  | 5.16E-39  |
| <b>Quorum sensing</b>                                            |              |                                                                                        |        |       |           |           |
| PA14_45960                                                       | <i>lasR</i>  | transcriptional regulator LasR; quorum sensing                                         | -1.31  | -0.39 | 1.48E-02  | 3.12E-02  |
| PA14_19120                                                       | <i>rhlR</i>  | transcriptional regulator RhlR; quorum sensing                                         | -2.29  | -1.19 | 1.68E-16  | 1.65E-15  |
| <b>Denitrification</b>                                           |              |                                                                                        |        |       |           |           |
| PA14_29620                                                       | <i>norR</i>  | anaerobic nitric oxide reductase transcriptional regulator; activator; denitrification | -2.45  | -1.29 | 8.47E-14  | 6.83E-13  |
| <b>Translation, post-translational modification, degradation</b> |              |                                                                                        |        |       |           |           |
| PA14_17700                                                       | <i>rpmE2</i> | 50S ribosomal protein L31                                                              | -9.38  | -3.23 | 2.56E-15  | 2.31E-14  |
| PA14_17710                                                       | <i>rpmJ</i>  | 50S ribosomal protein L36                                                              | -7.44  | -2.89 | 1.50E-33  | 3.65E-32  |
| <b>Transport of small molecules</b>                              |              |                                                                                        |        |       |           |           |
| PA14_11310                                                       |              | ABC transporter ATP-binding protein                                                    | -11.66 | -3.54 | 4.74E-18  | 5.09E-17  |
| PA14_13990                                                       |              | amino acid ABC transporter                                                             | -5.31  | -2.41 | 6.03E-53  | 3.06E-51  |
| PA14_15200                                                       |              | hypothetical protein                                                                   | -7.59  | -2.92 | 3.02E-34  | 7.64E-33  |
| PA14_15700                                                       |              | amino acid permease                                                                    | -4.25  | -2.09 | 2.71E-33  | 6.52E-32  |
| PA14_18670                                                       | <i>bfrB</i>  | bacterioferritin                                                                       | -5.62  | -2.49 | 5.45E-56  | 3.09E-54  |
| PA14_22650                                                       |              | ABC transporter                                                                        | -6.08  | -2.60 | 1.44E-25  | 2.36E-24  |
| PA14_24830                                                       |              | glutathione S-transferase                                                              | -8.39  | -3.07 | 4.19E-38  | 1.24E-36  |
| PA14_37760                                                       |              | MFS transporter                                                                        | -6.43  | -2.68 | 2.13E-54  | 1.17E-52  |
| PA14_39650                                                       | <i>cirA</i>  | TonB-dependent receptor                                                                | -7.73  | -2.95 | 2.91E-19  | 3.41E-18  |
| PA14_44520                                                       | <i>ydgF</i>  | drug efflux transporter                                                                | -25.66 | -4.68 | 2.54E-151 | 6.80E-149 |
| PA14_44530                                                       | <i>ygdE</i>  | multidrug efflux system protein MdtI                                                   | -9.50  | -3.25 | 3.29E-64  | 2.23E-62  |

|                                         |             |                                                        |        |       |          |          |
|-----------------------------------------|-------------|--------------------------------------------------------|--------|-------|----------|----------|
| PA14_44820                              |             | transthyretin family protein                           | -8.54  | -3.10 | 3.87E-77 | 3.94E-75 |
| PA14_44950                              | <i>ygfU</i> | transporter                                            | -10.28 | -3.36 | 2.42E-73 | 2.16E-71 |
| PA14_49130                              | <i>dctA</i> | C4-dicarboxylate transporter<br>DctA                   | -3.93  | -1.97 | 6.88E-19 | 7.84E-18 |
| PA14_63080                              | <i>lldP</i> | L-lactate permease                                     | -6.45  | -2.69 | 1.56E-56 | 9.09E-55 |
| PA14_67340                              | <i>codB</i> | cytosine/purines uracil thiamine<br>allantoin permease | -5.77  | -2.53 | 1.28E-29 | 2.60E-28 |
| PA14_73060                              | <i>cynT</i> | hypothetical protein                                   | -13.23 | -3.73 | 1.77E-17 | 1.85E-16 |
| <b>Two-component regulatory systems</b> |             |                                                        |        |       |          |          |
| PA14_21700                              |             | two-component sensor                                   | -5.35  | -2.42 | 4.55E-17 | 4.66E-16 |
| PA14_64410                              | <i>ybiI</i> | hypothetical protein                                   | -9.85  | -3.30 | 1.29E-22 | 1.78E-21 |
| PA14_73020                              |             | DksA/TraR family C4-type zinc<br>finger protein        | -21.61 | -4.43 | 3.97E-13 | 3.04E-12 |

184 <sup>a</sup> If part of an affected pathway or operon, genes differently expressed at least 1.5-fold were also considered.

185 <sup>b,c,d</sup> Functional categorization, gene ID and gene/product names are taken from the *Pseudomonas* Genome database<sup>52</sup> and  
186 KEGG (Kyoto Encyclopedia of Genes and Genome)<sup>53</sup>.

187

188 52. Winsor, G. L. *et al.* Enhanced annotations and features for comparing thousands of  
189 *Pseudomonas* genomes in the *Pseudomonas* genome database. *Nucleic Acids Res.* **44**, D646-53  
190 (2016).

191 53. Kanehisa, M., Sato, Y., Kawashima, M., Furumichi, M. & Tanabe, M. KEGG as a reference  
192 resource for gene and protein annotation. *Nucleic Acids Res.* **44**, D457-62 (2016).

193

194 **Supplementary Table S3. Strains and plasmids used in this study.**

| Strain/plasmid                                 | Genotype/relevant features                                                                                                                                                                                                                                                                                       | Source/reference <sup>a</sup> |
|------------------------------------------------|------------------------------------------------------------------------------------------------------------------------------------------------------------------------------------------------------------------------------------------------------------------------------------------------------------------|-------------------------------|
| <b><i>P. aeruginosa</i></b>                    |                                                                                                                                                                                                                                                                                                                  |                               |
| PA14                                           | Wild-type                                                                                                                                                                                                                                                                                                        | 57                            |
| PA14 <i>anr</i> -                              | Transposon insertion in <i>anr</i> ; library ID : 26855                                                                                                                                                                                                                                                          | 57                            |
| PA14 <i>rpoN</i> -                             | Transposon insertion in <i>rpoN</i> ; library ID :44482                                                                                                                                                                                                                                                          | 57                            |
| PA14Δ <i>hfq</i>                               | In-frame deletion of the <i>hfq</i> gene                                                                                                                                                                                                                                                                         | 58                            |
| PA14Δ <i>crcZ</i>                              | In-frame deletion of the <i>crcZ</i> gene                                                                                                                                                                                                                                                                        | This study                    |
| PA14Δ <i>hfq</i> Δ <i>crcZ</i>                 | Deletion of the <i>hfq</i> - and of the <i>crcZ</i> genes                                                                                                                                                                                                                                                        | This study                    |
| <b><i>E. coli</i></b>                          |                                                                                                                                                                                                                                                                                                                  |                               |
| DH5α                                           | <i>F</i> <sup>-</sup> , ϕ80 <i>dlacZ</i> Δ <i>M15</i> , Δ( <i>lacZYA</i> - <i>argF</i> ) <i>UI69</i> , <i>deoR</i> , <i>recA1</i> , <i>endA1</i> , <i>hdsR17</i> ( <i>rk</i> <sup>-</sup> , <i>mk</i> <sup>+</sup> ), <i>phoA</i> , <i>supE44</i> , λ <sup>-</sup> , <i>thi-1</i> , <i>gyrA96</i> , <i>relA1</i> | Invitrogen                    |
| HB101                                          | <i>thi-1 hsdS20</i> ( <i>rB</i> <sup>-</sup> , <i>mB</i> <sup>-</sup> ) <i>supE44 recA13 ara-14 leuB6 proA2 lacY1 galK2 xyl-5 mtl-1 rpsL20</i>                                                                                                                                                                   | 59                            |
| <b>Plasmids</b>                                |                                                                                                                                                                                                                                                                                                                  |                               |
| pME3087                                        | Suicide vector, ColE1 replicon, IncP-1, Mob; Tc <sup>R</sup>                                                                                                                                                                                                                                                     | 60                            |
| pME3087Δ <i>crcZ</i>                           | Suicide vector used for construction of the in-frame deletion of <i>crcZ</i> ; Tc <sup>R</sup>                                                                                                                                                                                                                   | This study                    |
| pME3087Δ <i>hfq</i>                            | Suicide vector used for construction of the in-frame deletion of <i>hfq</i> ; Tc <sup>R</sup>                                                                                                                                                                                                                    | This study                    |
| pRK2013                                        | Helper plasmid, ColE1 replicon, Tra; Km <sup>f</sup>                                                                                                                                                                                                                                                             | 61                            |
| pUX-BF13                                       | <i>mob</i> <sup>+</sup> <i>ori</i> -R6K; helper plasmid, providing the Tn7 transposition functions <i>in trans</i> ; Amp <sup>f</sup>                                                                                                                                                                            | 62                            |
| pBK-mini-Tn7- <i>rrnBP1</i> - <i>gfp</i> (AGA) | Delivery plasmid for mini-Tn7- <i>rrnBP1</i> - <i>gfp</i> -AGA-a, Amp <sup>f</sup> , Gm <sup>f</sup>                                                                                                                                                                                                             | 24                            |
| pMMB <i>crcZ</i>                               | pMMBΔ <i>rbs</i> harboring <i>crcZ</i> under transcriptional control of P <sub><i>tac</i></sub>                                                                                                                                                                                                                  | 15                            |

195 <sup>a</sup> Additional references:

- 196 57. Liberati, N. T. et al. An ordered, nonredundant library of *Pseudomonas aeruginosa* strain PA14 transposon  
197 insertion mutants. *Proc. Natl. Acad. Sci. United States Am.* 103, 2833–2838 (2006).  
198 58. Wurtzel, O. et al. The single-nucleotide resolution transcriptome of *Pseudomonas aeruginosa* grown in body  
199 temperature. *PLoS Pathog.* **8**, e1002945 (2012).  
200 59. Boyer, H. W. & Roulland-Dussoix, D. A complementation analysis of the restriction and modification of DNA in  
201 *Escherichia coli*. *J. Mol. Biol.* **41**, 459–472 (1969).  
202 60. Voisard, C. et al. in *Molecular Ecology of Rhizosphere Microorganisms* 67–89 (Wiley-VCH Verlag GmbH, 1994).  
203 doi:10.1002/9783527615810.ch6  
204 61. Figurski, D. H. & Helinski, D. R. Replication of an origin-containing derivative of plasmid RK2 dependent on a  
205 plasmid function provided *in trans*. *Proc. Natl. Acad. Sci. U. S. A.* **76**, 1648–1652 (1979).  
206 62. Bao, Y., Lies, D. P., Fu, H. & Roberts, G. P. An improved Tn7-based system for the single-copy insertion of cloned  
207 genes into chromosomes of Gram-negative bacteria. *Gene* **109**, 167–168 (1991).  
208

209 **Supplementary Table S4. Oligonucleotides used in this study.**

| Name | Sequence <sup>a</sup>                                     | Restriction site |
|------|-----------------------------------------------------------|------------------|
| C3   | GCACAACAACAATAACAAGCAACGACGAAG                            |                  |
| C6   | ATG <b>CGGATCC</b> GAAATGGTGTAAGGCGAAGG                   | <i>Bam</i> HI    |
| D112 | GTACAGGGAACACGCAACC                                       |                  |
| E2   | CTTCTCCGACTGGCTGCGGG                                      |                  |
| E6   | <b>TCTAGACGTAATACGACTCACTATAGGCACAACAACAATAA</b><br>CAAGC | <i>Xba</i> I     |
| E112 | CCCCGCCCACTCTTCAG                                         |                  |
| H71  | TTTTTT <b>TGGATCC</b> GATCCCAGGTGCGCGC                    | <i>Bam</i> HI    |
| I26  | CCCCACACTACCATCGGCGATGCGTGC                               |                  |
| I71  | TTTTTT <b>TGAATTC</b> GCGGCAGGTGCG                        | <i>Eco</i> RI    |
| J71  | GTGCCGCACTCCTTTAAGG                                       |                  |
| K3   | GCTGGAGTCGTTACGTGTTG                                      |                  |
| K71  | CCTTAAAGGAGTGCGGCACTGACGGGAGTCCGCTTTG                     |                  |
| T131 | CGAATGGCTTCTTGAGC                                         |                  |
| U131 | GAGCTTCGTATGGGGAG                                         |                  |
| W100 | GCATAC <b>GGTACC</b> ACCGCGACCTGAAGACCCTGGC               | <i>Kpn</i> I     |
| X100 | GCTCATT <b>TCTAGAC</b> AGTTTGAAGCGGCGCCGATG               | <i>Xba</i> I     |
| Y100 | CAATACATAAGCAGATGCCGTGCCAG                                |                  |
| Z100 | CTGGCACGGCATCTGCTTATGTATTGAAACAAAGCACGCACCTACTTGGG        |                  |

210 <sup>a</sup> Restriction sites are highlighted in bold. The T7 promoter sequence is underlined.

211

212
